1 **Metformin Confers Cardiac and Renal Protection in Sudden Cardiac Arrest via AMPK Activation**

2 Cody A. Rutledge MD, PhD<sup>1</sup>, Claudia Lagranha PhD<sup>1</sup>, Takuto Chiba PhD<sup>2,3</sup>, Kevin Redding MS<sup>1</sup>, Donna B.  
3 Stolz PhD<sup>4</sup>, Sunder Sims-Lucas PhD<sup>2,3</sup>, Cameron DeZfulian MD<sup>5</sup>, Jonathan Elmer MD, MS<sup>6</sup>, Brett A.  
4 Kaufman PhD<sup>1</sup>

5

6 1. Division of Cardiology, Vascular Medicine Institute, Department of Medicine, University of Pittsburgh,  
7 Pittsburgh, PA, USA

8 2. Rangos Research Center, Children's Hospital of Pittsburgh, University of Pittsburgh, Pittsburgh, PA,  
9 USA

10 3. Division of Nephrology, Department of Pediatrics, University of Pittsburgh School, Pittsburgh, PA, USA

11 4. Department of Cell Biology, University of Pittsburgh, Pittsburgh, PA, USA

12 5. Department of Critical Care, Texas Children's Hospital, Houston, TX, USA

13 6. Departments of Emergency Medicine, Critical Care Medicine, and Neurology, University of Pittsburgh,  
14 Pittsburgh, PA, USA

15

16 **Corresponding Author:**

17 Brett A. Kaufman

18 200 Lothrop Street

19 BST E1241

20 Pittsburgh, PA 15261

21 1-412-624-8644

22 bkauf@pitt.edu

23

24 **Conflicts of Interest and Source of Funding:**

25 The authors of this manuscript have no financial or ethical conflicts of interest to disclose.

26

27 **Abstract**

28 Sudden cardiac arrest (SCA) affects over 600,000 individuals annually in the United States and is  
29 associated with substantial mortality. After resuscitation, multi-system organ damage is common and  
30 largely attributable to ischemia-reperfusion injury. The anti-diabetic drug metformin improves cardiac  
31 outcomes in models of myocardial ischemia and ischemia-reperfusion. In this study, we evaluated the  
32 role of metformin pretreatment in a mouse model of SCA. We found that two weeks of metformin  
33 pretreatment protects cardiac ejection fraction and reduces acute kidney injury post-SCA in non-diabetic  
34 mice. Further, metformin pretreatment prior to SCA activates AMPK signaling and is associated with  
35 altered mitochondrial dynamics and markers of autophagy following arrest. Direct AMPK activation and  
36 inhibition studies demonstrate that activation is necessary and sufficient for metformin-mediated  
37 protection of cardiac and renal tissues in this model. We were unable to demonstrate cardiac protection  
38 with a single-dose metformin rescue therapy. Importantly, these findings translate into patients. We  
39 retrospectively evaluated the extent of cardiac and kidney damage in diabetic patients resuscitated from  
40 SCA. Metformin-treated patients have less evidence of heart and kidney damage after arrest than  
41 diabetics who have not received metformin. Together, these data support AMPK activation as a  
42 preventive mechanism in ischemia-reperfusion injury.

43

## 44 Introduction

45 Sudden cardiac arrest (SCA) refers to the abrupt cessation of cardiac function and affects over  
46 600,000 patients annually in the United States (1,2). Patients with return of spontaneous circulation  
47 after SCA experience systemic ischemia-reperfusion injury, typically resulting in multi system organ  
48 damage. Common findings include cardiogenic shock, acute renal failure, liver damage, and neurologic  
49 dysfunction (3–5). Previous observational studies in cardiac arrest patients have shown that low cardiac  
50 ejection fraction (EF) (6) and reduced kidney function (7,8) are predictors of increased mortality. Despite  
51 its prevalence, no pharmacologic therapy has been shown to improve overall survival in post-cardiac  
52 arrest syndrome.

53 Metformin is an oral antihyperglycemic agent used as the first-line agent for type 2 diabetes  
54 that has proven beneficial in a number of cardiovascular conditions(9,10). Metformin enhances insulin  
55 sensitivity and normalizes glucose and lipid homeostasis (11–13). Beyond its role in controlling diabetes,  
56 metformin has demonstrated clinical benefit across a wide variety of pathologies, including improved  
57 mortality in the setting of coronary artery disease (10), congestive heart failure (14), acute kidney injury  
58 (AKI)(15), chronic kidney disease (14), septic shock (16,17), and major surgical procedures (18).  
59 Cardiovascular studies suggest that improved outcomes occur independently of the glucose-lowering  
60 effects of metformin and may instead be attributable to metformin's other pleiotropic effects (19).  
61 Several mechanisms beneficial to cardiovascular health have been implicated in metformin's numerous  
62 effects, including reduced oxidative stress, anti-apoptotic activities, JNK inhibition, complex I inhibition,  
63 and AMPK activation (20,21).

64 Importantly, AMPK activity and expression is induced in mice and humans by ischemic stress as  
65 a compensatory response (22). AMPK activity limits endoplasmic reticulum (ER) stress (23) and AMPK  
66 deficiency can be partially rescued through reduction of mitochondrial oxidative stress (24). While AMPK  
67 activity is essential for survival after ischemic stress (23), it is unclear whether AMPK activity is the  
68 mediator of metformin-mediated protection in ischemic heart disease. Furthermore, it is not clear  
69 whether the adaptive upregulation of AMPK during cardiac stress is optimal, or whether further  
70 activation could even more strongly impact recovery in cardiac injury models.

71 In this study, we sought to test metformin's potential benefit on heart and kidney protection  
72 after SCA, both to clarify its relevance to the development of cardiac and peripheral tissue dysfunction,  
73 and to determine the role of AMPK in post-arrest outcomes. Therefore, we evaluated outcomes  
74 following SCA in mice with chemical activation of AMPK, via 5-aminoimidazole-4-carboxamide-1- $\beta$ -D-  
75 ribofuranoside (AICAR; an AMP-mimetic(25)) and with metformin treatment, and with inhibition of  
76 AMPK via compound C (a reversible competitive inhibitor(26)) given concomitantly with metformin  
77 treatment. We found that both metformin and AICAR pretreatment improved cardiac and renal  
78 outcomes after resuscitation from SCA, and that metformin therapy is associated with altered markers  
79 of autophagy and mitochondrial dynamics. We also showed that metformin's benefits are negated by  
80 compound C, supporting an AMPK-dependent mechanism. Further, we performed a retrospective  
81 analysis of clinical outcomes in diabetic cardiac arrest patients with and without metformin therapy  
82 prior to arrest. We found that diabetic patients taking metformin prior to SCA had lower serum markers  
83 of cardiac and renal damage 24 hours after arrest than non-metformin diabetic patients. Taken  
84 together, we have identified AMPK activity as a protective mechanism invoked SCA-induced damage and

85 demonstrated benefit of metformin pretreatment on cardiac and renal outcomes in SCA, which provides  
86 substantial support for metformin's use as a prophylactic in patients at risk for SCA.

87

## 88 Results

### 89 SCA mice have increased AMPK signaling by pathway analysis

90 To gain insight into gene expression pathways affected in the heart *in vivo* after SCA, we  
91 performed microarray analysis of left ventricles (LVs) 24 hours post-resuscitation. In these initial  
92 discovery experiments, male and female mice were evenly divided into untreated sham and untreated  
93 arrest groups, where the arrest group underwent ultrasound-guided direct LV injection of potassium  
94 chloride (KCl) to cause SCA (Figure 1A). In brief, these mice sustained eight minutes of asystole followed  
95 by up to three minutes of cardiopulmonary resuscitation (CPR) until return of spontaneous circulation  
96 (ROSC) occurred. One day after surgery, LV tissue was collected for RNA expression analysis (Figure 1B).  
97 From Ingenuity Pathway Analysis, *AMPK Signaling* pathway was the most prominent by ranked p-value,  
98 while *Autophagy* was the sixth most significantly changed pathway between sham and untreated SCA  
99 mice (Figure 1C, Supplemental Figure 1).

### 100 Metformin pretreatment protects cardiac EF and kidney function after SCA

101 AMPK signaling has been shown to be upregulated in myocardial ischemia/reperfusion injury as  
102 a compensatory response (27). Similarly, loss of key AMPK subunits increases infarct size in experimental  
103 systems (23,24). In *ex vivo* rat hearts, infarct size can be reduced by acute, transitory AMPK activation  
104 (28,29). Furthermore, AMPK activation has been shown to delay the progression of heart failure in a  
105 chronic pressure overload model (30). Although the etiology of cardiac dysfunction in myocardial  
106 infarction and pressure overload is distinct from SCA, we reasoned that further enhancing AMPK activity  
107 could show functional cardiac benefits in the *in vivo* SCA model. To test this hypothesis, male and female  
108 mice were divided into sham and arrest groups, with and without metformin pretreatment. Metformin-  
109 treated mice were given 1 mg/mL of metformin in water for two weeks. There were no significant  
110 differences among baseline animal characteristics, including weight, ratio of female mice, or EF (Table 1,  
111 Figure 2A). Importantly, there were no differences among groups for body weight in these non-diabetic  
112 mice. Twenty-four hours after surgery, untreated arrest mice had significantly lower EF than untreated  
113 sham mice (sham: 59.5±1.7%; untreated arrest: 41.1±2.7%, p<0.0001, Figure 2A), as expected based on  
114 our previous description of this model(31). Importantly, metformin pretreatment significantly improved  
115 EF 24 hours post-SCA (arrest metformin: 51.6±2.6%, p<0.01 vs. untreated arrest) to a level not  
116 significantly different from sham mice (Figure 2A). There were no changes to post-operative body  
117 temperature, time to resuscitation, or 24-hour glucose levels between arrest groups (Table 1). The lack  
118 of detectable changes in body weight or in the 24 hour post-SCA glucose suggests that differences in  
119 systematic glucose handling was inadequate to explain later phenotypes.

120 The effects of whole-body ischemia/reperfusion injury can be detected in peripheral tissues,  
121 particularly in the kidney (31). Unsurprisingly, untreated arrest mice had significant kidney damage  
122 when compared to untreated sham mice at one day post-SCA. Kidney damage was quantified by serum  
123 creatinine (sham: 0.36±0.04 mg/dL; untreated arrest: 1.49±0.14 mg/dL, p<0.0001, Figure 2B-C) and  
124 blood urea nitrogen (BUN) levels (sham: 26.6±5.2 mg/dL; untreated arrest: 153.9±28.4 mg/dL, p<0.001),  
125 and tubular injury score by histological analysis (sham: 0.11±0.04; untreated arrest: 3.33±0.24,  
126 p<0.0001). The 1 mg/mL metformin-pretreated arrest mice had some improvement over untreated  
127 arrest mice, with significantly reduced creatinine levels (metformin arrest: 0.92±0.24 mg/dL, p<0.05 vs.  
128 untreated arrest). However, metformin treatment did not fully protect kidneys from SCA-induced  
129 damage because serum creatinine was still significantly elevated compared to untreated sham (p<0.05

130 vs. sham), as was BUN ( $121.2 \pm 28.0$  mg/dL,  $p < 0.05$  vs. sham). Similarly, histological analysis revealed an  
131 increase in tubular injury score in metformin arrest mice ( $2.26 \pm 0.24$ ,  $p < 0.0001$  vs. sham) that was  
132 partially improved compared to untreated arrest ( $p < 0.01$ ; Figure 2B-C). Metformin pretreatment in  
133 sham mice did not significantly affect creatinine levels ( $0.38 \pm 0.06$  mg/dL), BUN ( $28.8 \pm 9.4$  mg/dL), or  
134 tubular injury score ( $0.14 \pm 0.04$ ; Figure 1C) relative to untreated sham. The time of renal ischemia was  
135 unchanged between untreated and metformin-pretreated arrest groups (Figure 2D; Table 1), suggesting  
136 the reperfusion differences were not a component of kidney protection.

137 Metformin dosage has been a concern for patients with preexisting kidney damage, especially  
138 for those with chronic kidney disease, but lower doses have been found safe and avoid hyperlactatemia  
139 (32,33). Furthermore, data have suggested that differences in dosage alter metformin targets, with low  
140 doses activating AMPK, but higher doses causing mitochondrial Complex I inhibition(34). We therefore  
141 treated an additional mouse cohort with a lower dose of metformin (0.2 mg/mL in drinking water as  
142 opposed to 1 mg/mL in Figure 2) to reduce potential complications of decreased metformin clearance  
143 after arrest. We found that the low-dose metformin cohort did not have significant cardio-protection  
144 when compared to untreated arrest mice (EF of low-dose metformin:  $50.7 \pm 3.3\%$ ,  $p = 0.08$  vs. untreated  
145 arrest) (Supplemental Figure 3A), though this cohort may not have been powered to detect cardiac  
146 changes. However, the low-dose metformin arrest cohort did have lower serum creatinine ( $0.40 \pm 0.05$   
147 mg/dL,  $p < 0.001$  vs. untreated arrest) and BUN levels ( $64.83 \pm 8.24$  mg/dL,  $p < 0.05$  vs. untreated arrest),  
148 but unchanged tubular injury when compared to untreated arrest mice ( $2.04 \pm 0.71$ ,  $p = 0.08$  vs. untreated  
149 arrest) (Supplemental Figure 3). These results suggest superior protection against kidney damage with  
150 low-dose metformin over the higher dose metformin pretreatment, and protection against  
151 ischemia/reperfusion injury by metformin need not be through mitochondrial respiration dysfunction.

#### 152 **Metformin promotes AMPK activation in the LV following SCA**

153 As a marker of total AMPK activation, we assessed phosphorylation of threonine-172 of the  
154 AMPK $\alpha$  subunit (35). One day after surgery, LVs from sham and arrest groups with and without  
155 metformin pretreatment ( $n = 6$ /group) were assessed for p-AMPK, total AMPK, and glyceraldehyde 3-  
156 phosphate dehydrogenase (GAPDH) protein expression (Figure 2E). Surprisingly, metformin treatment  
157 did not appear to cause activation of p-AMPK/AMPK in the sham mice (untreated sham:  $1.00 \pm 0.13$ ;  
158 metformin sham:  $0.80 \pm 0.11$ ). However, we found significantly elevated p-AMPK/AMPK in metformin-  
159 pretreated arrest mice ( $1.52 \pm 0.14$  AU) when compared to untreated sham ( $1.00 \pm 0.13$  AU,  $p < 0.05$ ),  
160 untreated arrest ( $0.70 \pm 0.12$ ,  $p < 0.001$ ), and metformin-pretreated sham mice ( $0.80 \pm 0.11$ ,  $p < 0.01$ ). p-  
161 AMPK/GAPDH was similarly elevated in the LVs of metformin arrest mice ( $1.47 \pm 0.08$  AU) when  
162 compared to untreated sham ( $1.00 \pm 0.10$  AU,  $p < 0.05$ ), untreated arrest ( $0.90 \pm 0.14$  AU,  $p < 0.01$ ), and  
163 metformin-pretreated sham ( $0.98 \pm 0.09$  AU,  $p < 0.05$ ). Total AMPK/GAPDH was not significantly changed  
164 between groups. These data suggest that cardiac injury with metformin-pretreatment increases the  
165 potential for AMPK activation.

#### 166 **AMPK activation causes cardiac and renal protection after SCA and is necessary for metformin's** 167 **protection of EF**

168 Because metformin has multiple potential modes of action, we tested whether direct AMPK  
169 activation was sufficient for the observed enhanced EF, and whether metformin benefit in SCA  
170 depended on AMPK activity. To that end, male and female mice were divided into two groups: 1) AICAR

171 pretreatment, which activates AMPK (36), and 2) metformin-pretreatment combined with compound C,  
172 an established AMPK inhibitor (13). Both groups underwent two weeks of intraperitoneal (IP) injections  
173 prior to SCA and subsequent evaluation 24-hours after arrest. These groups were compared to the  
174 untreated arrest and metformin pretreated arrest mouse results described above. One day after  
175 surgery, AICAR pretreated arrest mice had significantly improved EF when compared untreated arrest  
176 mice (AICAR arrest:  $52.0 \pm 2.4\%$ ,  $p < 0.05$  vs. untreated arrest, Figure 3A). Compound C not only prevented  
177 the beneficial effects of metformin on post-SCA EF, but also caused significantly reduced EF (metformin  
178 + C arrest:  $30.0 \pm 2.9\%$ ) when compared to untreated arrest ( $p < 0.05$ ). There was no change to body  
179 weight, ratio of female mice, or baseline EF (Table 1 and Supplemental Figure 2) prior to arrest. The  
180 effects of AICAR pretreatment phenocopies metformin pretreatment, and compound C blocks the  
181 benefit of metformin strongly suggest that AMPK activation is necessary and sufficient for the  
182 metformin-mediated protection of cardiac function after SCA. We cannot rule out the involvement of  
183 involvement of glucose homeostasis and insulin sensitivity as contributing factors in this process. We  
184 have not observed differences in random glucose and insulin levels, suggesting that such an effect would  
185 be modest.

186 In the same cohort of mice, measures of kidney damage were significantly lower in AICAR-  
187 pretreated mice than untreated arrest mice. Both creatinine (AICAR arrest:  $0.67 \pm 0.25$  mg/dL,  $p < 0.05$ ,  
188 Supplemental Figure 4A) and tubular injury score (AICAR arrest:  $1.45 \pm 0.42$ ,  $p < 0.01$ ) were significantly  
189 improved relative to untreated arrest mice (creatinine  $1.49 \pm 0.14$  mg/dL, tubular injury score  $3.33 \pm 0.24$ ).  
190 In contrast, there was no significant change when comparing renal outcomes in metformin-treated and  
191 metformin + compound C-treated arrest mice (Supplemental Figure 4A). AICAR phenocopied the  
192 metformin benefit in measures of kidney function and damage, suggesting a role for AMPK activation in  
193 those processes. The limited change in these measures in the metformin + compound C cohort vs.  
194 untreated arrest mice may suggest that at baseline AMPK activation is limited and cannot be further  
195 reduced but would require further experimentation.

#### 196 **AICAR promotes AMPK activation in the LV following SCA**

197 Twenty-four hours after surgery, LVs from arrest groups ( $n=6$ ) were assessed for AMPK and p-  
198 AMPK expression (Figure 3B). As expected, p-AMPK/AMPK was significantly elevated in AICAR-  
199 pretreated arrest mice (AICAR arrest:  $2.54 \pm 0.59$  AU) when compared to untreated arrest ( $1.00 \pm 0.17$  AU,  
200  $p < 0.05$ ). p-AMPK/GAPDH and AMPK/GAPDH were not significantly changed in the AICAR group.  
201 Metformin + compound C pretreated mice had lower p-AMPK/AMPK than the AICAR group (arrest  
202 metformin + C:  $0.52 \pm 0.13$  AU,  $p < 0.05$ ) and p-AMPK/GAPDH ( $0.54 \pm 0.11$  AU,  $p < 0.05$ ) but no significant  
203 change from the untreated arrest group.

#### 204 **Metformin affects mitochondrial morphology and markers of mitochondrial dynamics and autophagy**

205 Since ischemia/reperfusion is well known to induce mitochondrial damage, electron microscopy  
206 was used to identify differences in mitochondrial perimeter, area, and circularity among in hearts of  
207 untreated sham, untreated arrest, and metformin-pretreated arrest mice (Figure 4A). The untreated  
208 arrest mice showed a decrease in mitochondrial perimeter and area (perimeter:  $3.06 \pm 0.06$   $\mu\text{m}$ ; area:  
209  $0.60 \pm 0.02$   $\mu\text{m}^2$ ; Figure 4B) when compared to sham (perimeter:  $3.81 \pm 0.09$   $\mu\text{m}$ ; area:  $0.87 \pm 0.04$   $\mu\text{m}^2$ ,  
210  $p < 0.0001$  for both measures). Metformin-pretreated arrest mice showed a modest but significant  
211 increase of perimeter and area (perimeter:  $3.33 \pm 0.07$   $\mu\text{m}$ ; area:  $0.70 \pm 0.03$   $\mu\text{m}^2$ ) when compared to  
212 untreated arrest mice ( $p < 0.05$  for both measures). Both the untreated arrest mice ( $0.76 \pm 0.001$   $\mu\text{m}$ ,

213  $p < 0.0001$ ) and metformin-pretreated arrest mice ( $0.75 \pm 0.01 \mu\text{m}$ ;  $p < 0.0001$ ) had more circular  
214 mitochondria than the untreated sham mouse mitochondria ( $0.69 \pm 0.01 \mu\text{m}$ ). These data demonstrate  
215 changes in mitochondrial morphology at 24 hours post-SCA, with improvements in mitochondrial area  
216 and perimeter in metformin-pretreated arrest mice compared to untreated arrest mice.

217 We also looked at markers of mitochondrial abundance in the LVs. First, representative proteins  
218 of mitochondrial respiratory complexes were assessed from LV extracts taken 24 hours after arrest from  
219 untreated sham, untreated arrest, metformin-pretreated sham, and metformin-pretreated arrest mice.  
220 There was a mild but significant elevation in relative complex II expression in the metformin-pretreated  
221 arrest mice ( $1.29 \pm 0.10$  AU) compared to untreated sham mice ( $0.98 \pm 0.04$  AU,  $p < 0.01$ ), but otherwise,  
222 relative expression of representative proteins was unchanged across the groups (Figure 4C). Second, we  
223 examined mtDNA relative abundance and damage in the cardiac tissue from these groups. Unlike in  
224 failed hearts (37), the arrest group did not show a statistically significant decrease in mtDNA levels at 24  
225 hours post-SCA. The metformin-pretreated arrest mice had slightly higher relative mitochondrial DNA  
226 (mtDNA) levels ( $1.16 \pm 0.06$  AU) than untreated arrest mice ( $0.89 \pm 0.05$  AU,  $p < 0.05$ , Figure 4D), but were  
227 not significantly different from the sham group ( $1.00 \pm 0.05$  AU). Interestingly, the metformin-pretreated  
228 arrest mice had significantly less mtDNA damage ( $0.03 \pm 0.1$  lesions/10kb mtDNA) than untreated arrest  
229 mice ( $0.59 \pm 0.16$  lesions,  $p < 0.05$ ) as measured by long extension PCR assays. The small but significant  
230 increases in mtDNA and complex II in the metformin-pretreated arrest mice are consistent with an  
231 increase in mitochondrial biogenesis, but the significant improvement in mtDNA integrity suggests an  
232 improvement in overall mitochondrial quality.

233 To better understand the alterations in mitochondrial morphology, we examined the relative  
234 levels of several proteins involved in establishing mitochondrial shape. Mitofusin 2 (MFN2), a  
235 mitochondrial outer membrane GTPase involved in fusion, had reduced expression in metformin-  
236 pretreated arrest mice ( $0.53 \pm 0.07$  AU) compared to all other groups (sham:  $1.00 \pm 0.10$  AU,  $p < 0.01$ ;  
237 arrest:  $1.06 \pm 0.07$  AU,  $p < 0.001$ ; sham metformin:  $0.89 \pm 0.04$  AU,  $p < 0.05$ ; Figure 5A). OPA1, also a  
238 dynamin-related GTPase, resides in the inner membrane to perform fusogenic functions(38), and  
239 followed a similar overall trend with significantly reduced levels in metformin-pretreated arrest mice  
240 ( $0.75 \pm 0.04$  AU) when compared to untreated arrest mice ( $1.13 \pm 0.10$  AU,  $p < 0.05$ ). In contrast, dynamin-  
241 related protein 1 (DRP1), whose activity is regulated by its phosphorylation at Ser-616(39), showed no  
242 significant change in p-DRP/DRP between sham and arrest groups. Metformin pretreatment appeared to  
243 modestly improve p-DRP/DRP post-arrest but the effect was not statistically significant ( $p = 0.08$ ). While  
244 mitochondrial perimeter and area are increasing with metformin-pretreatment in SCA hearts, markers  
245 of fusion decrease and fission is unchanged from sham or arrest. The MFN2 decrease may instead  
246 suggest that other mitochondrial quality control processes contribute to the improved mitochondrial  
247 morphology.

248 Interestingly, MFN2 decrease is consistent with the activation of mitophagy (40,41), due to its  
249 ubiquitination and targeted proteolysis during autophagy. Metformin has been reported to impact heart  
250 autophagy through AMPK signaling (42,43). To test engagement of autophagy in the SCA model, LVs  
251 collected 24 hours after SCA from untreated sham, untreated arrest, metformin-pretreated sham, and  
252 metformin-pretreated arrest mice were evaluated for markers of autophagy by western blot analysis.  
253 First, we evaluated the mTOR signaling pathway, a crucial negative regulator of autophagy (44).  
254 Consistent with prior findings (45), we found the marker of mTOR activity, p-mTOR (Ser-2448), to be  
255 significantly reduced in untreated arrest ( $0.58 \pm 0.08$  AU,  $p < 0.05$ ), metformin-pretreated sham ( $0.55 \pm 0.08$



256 AU,  $p < 0.05$ ), and metformin-pretreated arrest mice ( $0.53 \pm 0.07$  AU,  $p < 0.05$ ) when compared to sham  
257 mice ( $1.0 \pm 0.15$  AU, Figure 5A). Total mTOR protein (mTOR/GAPDH) was only reduced in the metformin-  
258 pretreated arrest group ( $0.71 \pm 0.08$  AU) when compared to sham ( $1.00 \pm 0.05$  AU,  $p < 0.05$ ) and untreated  
259 arrest ( $0.96 \pm 0.06$  AU,  $p < 0.05$ ) groups. The ratio of p-mTOR to total mTOR was unchanged between  
260 groups, but we focus on p-mTOR/GAPDH as a measure of activity. As positive downstream markers of  
261 mTOR activity, S6 ribosomal protein (S6) total expression and phosphorylation at Ser-240/244 (p-S6)  
262 were assessed. We found that p-S6 (pS6/GAPDH) was reduced in untreated arrest ( $0.41 \pm 0.05$  AU,  
263  $p < 0.01$ ) and metformin-pretreated arrest mice ( $0.52 \pm 0.07$  AU,  $p < 0.05$ ) when compared to sham  
264 ( $1.00 \pm 0.17$  AU; Figure 5B). Total S6 was increased in the metformin sham mice compared to untreated  
265 sham ( $1.40 \pm 0.08$  AU,  $p < 0.05$ ) and decreased in metformin-pretreated arrest mice ( $0.80 \pm 0.05$  AU,  
266  $p < 0.001$ ) when compared to untreated sham mice ( $1.00 \pm 0.10$  AU). p-S6/S6 was significantly reduced in  
267 the untreated arrest mice ( $0.49 \pm 0.08$  AU) when compared to untreated sham mice ( $1.00 \pm 0.17$  AU,  
268  $p < 0.05$ ). p-S6 levels are increased with metformin in sham mice, consistent with the metformin  
269 activation of mTOR observed in other contexts (43). However, because mTOR activity based on p-mTOR  
270 and pS6 are not significantly different between arrest and metformin arrest mice, the data suggest that  
271 decreased mTOR activation alone is insufficient to explain the survival benefit of metformin.

272 Because metformin has been reported to increase cardiac mitophagy in cardiomyopathy  
273 (42,43), we evaluated protein expression for markers associated with autophagosome formation,  
274 including p62/Sequestosome 1, a cargo receptor associated with degradation of ubiquitinated proteins  
275 (46), and LC3 processing. p62 expression (normalized to GAPDH) was significantly lower in the  
276 metformin arrest mice ( $0.67 \pm 0.09$  AU) when compared to the untreated arrest group ( $1.22 \pm 0.10$  AU,  
277  $p < 0.05$ , Figure 5B). The relative levels of microtubule-associated protein light chain 3 (LC3), specifically  
278 levels of uncleaved (LC3-I) and cleaved (LC3-II) forms, were also monitored as an indicator of changes in  
279 autophagy initiation(47). Interestingly, the LC3-II to LC3-I ratio was significantly increased in untreated  
280 arrest mice ( $1.91 \pm 0.15$  AU) compared to sham ( $1.00 \pm 0.18$  AU,  $p < 0.01$ ), whereas the metformin-  
281 pretreated arrest mice had significantly reduced LC3-II/LC3-I ( $1.17 \pm 0.17$  AU) when compared to  
282 untreated arrest mice ( $p < 0.05$ , Figure 5B). LC3-I and LC3-II expression levels (normalized to GAPDH)  
283 were not significantly changed between groups (Supplemental Figure 5). The restoration of p62 and LC3-  
284 II/I to untreated sham levels in metformin-pretreated LVs after SCA appears to associate with the  
285 improvements in the mitochondrial area and perimeter in the metformin arrest hearts vs. the sham  
286 arrest hearts.

287 Taken together, these data suggest that increase autophagic flux contributes to the improved  
288 mitochondrial network in metformin-pretreated arrest mice. Metformin increases the mitochondrial  
289 perimeter and area despite the decrease in MFN2 and OPA1 fusogenic proteins. Further, there is an  
290 increase in p62 and LC3-II in arrest hearts, which is consistent with impaired autophagic flux observed by  
291 others(48). Notably, metformin pretreatment reduced p62 and LC3-II levels and significantly improved  
292 mtDNA integrity after SCA, suggesting that autophagy in those hearts was also improved, which is  
293 consistent with the observed lower level of mitochondrial fragmentation. Additional studies are  
294 required to analyze flux in real-time.

### 295 **Metformin does not improve outcomes as a rescue therapy**

296 In *ex vivo* studies of ischemia-reperfusion, acute metformin administration just prior to stop-  
297 flow mediated injury improved developed pressures during recovery(44). In ligation-mediated

298 ischemia/reperfusion experiments *in vivo*, 125  $\mu\text{g}/\text{kg}$  metformin injection into the LV lumen at the time  
299 of reperfusion resulted in a decreased infarct area and improved EF in non-diabetic mice(45). In contrast  
300 to coronary artery ligation experiments, which generally rely on >30 minute ischemic times and  
301 generate significant cardiomyocyte death, our SCA model is 8 minutes of ischemia and lacks overt cell  
302 death(29). In our SCA model, when metformin was given directly into the LV at resuscitation as a rescue  
303 therapy (1,250  $\mu\text{g}/\text{kg}$ ), there was no change to EF at one day after SCA (arrest rescue metformin:  
304  $42.1\pm 2.4\%$ ) compared to untreated arrest mice (Figure 6). Similarly, there was no change in creatinine  
305 (arrest rescue metformin:  $1.2\pm 0.25$ ), BUN (arrest rescue metformin:  $155.3\pm 14.2$ ), or tubular injury score  
306 (arrest rescue metformin:  $2.45\pm 0.55$ ) when compared to untreated arrest mice (Supplemental Figure  
307 4B). Baseline EF was not significantly different between groups (Supplemental Figure 2). These data are  
308 consistent with the notion that metabolic adaptation is required for the metformin protection after SCA.

### 309 **Metformin improves markers of cardiac and renal damage in humans one day after SCA**

310 Data supporting metformin use in cardiovascular disease are conflicting, often varying with the  
311 particular condition or disease (21). To mirror our observations in mice, we focused in this retrospective  
312 study on diabetic patients who survived to hospital care after resuscitation from SCA. Some of these  
313 patients were taking metformin prior to SCA. We started with clinical data from 2,692 patients treated  
314 at a single academic medical center, of whom 692 (26%) had a history of diabetes. We excluded 268  
315 patients with chronic kidney disease, 20 who were transferred to our facility more than 24 hours post-  
316 arrest, 56 for whom home medications were unknown, 7 who rearrested prior to labs being drawn, and  
317 1 who was resuscitated with extracorporeal membrane oxygenation, leaving 341 patients in our final  
318 analysis. Mean age was  $65 \pm 13$  years, and 148 (43%) were female (Table 2). Overall, 140 (41%) patients  
319 were prescribed metformin prior to arrest, 153 (45%) were prescribed insulin, and 92 (27%) were  
320 prescribed other oral hyperglycemic medications. Serum troponin and creatinine were measured as part  
321 of routine clinical care, typically at least once daily, and used to quantify heart and kidney injury,  
322 respectively. We did not find reliable echocardiography data in this cohort. Median peak troponin in the  
323 first 24 hours post-arrest was 1.4 (interquartile range, IQR: 1.0-1.7) and median peak creatinine was 1.4  
324 (IQR: 1.0-2.0). We used generalized linear models (gamma distribution, log link) to test the independent  
325 association of pre-arrest metformin use with peak troponin and creatinine within 24 hours after SCA,  
326 adjusting for clinically relevant confounders including age, sex, arrest location (in- vs out-of-hospital),  
327 witnessed collapse, layperson CPR, number of epinephrine doses administered, cardiac etiology of  
328 arrest, and Charlson comorbidity index, as well as the use of insulin or other oral hyperglycemic  
329 medications (Table 2). We handled the 2% missing data using multiple imputations. Metformin  
330 prescription at the time of SCA was independently associated with lower 24-hour peak serum troponin  
331 and lower 24-hour peak serum creatinine (Table 3). Without A1C levels, we cannot rule out whether  
332 there are differences in glycemic control that associate with the improved cardiac and renal measures in  
333 these patients.

334 **Discussion**

335 SCA is a common cardiac event for which there are extremely poor outcomes and no current  
336 course-altering interventions. Metformin therapy, a first-line diabetes treatment, is beneficial in a  
337 number of cardiovascular disorders(9,10)making it a candidate approach for SCA. Metformin impacts  
338 many metabolic processes, including activation of the AMPK signaling pathway, decreased ER stress and  
339 ROS, improved autophagy and mitochondrial biogenesis, and inhibition of the mitochondrial  
340 permeability transport pore (mPTP) (49–53). Studies of metformin’s effects on cardiac function have  
341 largely utilized ischemia-reperfusion injury models with ischemic periods of 25-30 minutes, both *in vivo*  
342 and *ex vivo*. Metformin, applied as a therapy, decreases scar size in reversible coronary artery ligation  
343 (21,28,53–56) or whole-heart ischemia-reperfusion (21,57), respectively. The long ischemic duration in  
344 these models involves substantial cardiomyocyte necrosis, and much of metformin’s beneficial effect  
345 has been attributed to reduction of mPTP-mediated cell death in the infarct border zone (49). In  
346 contrast, our data demonstrates metformin’s protection of *in vivo* EF in a SCA model that features 8  
347 minute ischemia period without evidence of cardiac cell death (31). Therefore, with a shorter ischemic  
348 duration and no evidence of apoptosis, we have identified a unique pathway of metformin’s cardiac  
349 protection.

350 The requirement of AMPK signaling for metformin’s cardiac benefits was confirmed by  
351 downstream inhibition and rescue experiments. Specifically, metformin’s effects were negated by  
352 concomitant treatment with the AMPK inhibitor compound C and were replicated by treatment with the  
353 direct AMPK activator AICAR alone. Taken together, these data rigorously support that AMPK activation  
354 is sufficient and necessary for cardiac protection.

355 Metformin pretreatment also protects against kidney injury in our model of SCA, reducing  
356 creatinine levels, BUN, and tubular injury scores (Figure 2). As there is no change to ischemic duration in  
357 the kidneys between untreated arrest and metformin-pretreated arrest mice, as measured by renal  
358 artery doppler ultrasound (Table 1), this renal protection is likely intrinsic to the kidney rather than  
359 secondary to the improved cardiac function. Previous studies have demonstrated beneficial effects of  
360 metformin on renal performance after primary renal ischemic injury (58–60). Our model extends the  
361 known impact of metformin on renal function by demonstrating comparable beneficial effects in a  
362 model featuring renal ischemia secondary to cardiac arrest, more analogous to clinically observed renal  
363 injury.

364 There exists concern about metformin therapy in the presence of kidney injury, as metformin  
365 accumulation can lead to potentially lethal lactic acidosis (33). While we did not assess lactate build-up  
366 or metformin accumulation in our model, we did treat an additional cohort of mice with a lower dose of  
367 metformin (Supplemental Figure 3), comparable to concentrations of human doses, to address concerns  
368 about supra-pharmacologic metformin concentrations (61). We found that low-dose metformin  
369 conferred better renal protection than standard-dose metformin, as measured by creatinine levels after  
370 arrest (Supplemental Figure 3B), though cardiac EF improvement did not reach significance in this group.  
371 There has been some concern about the mechanism of action in high-dose vs. low-dose metformin  
372 therapy; recent work has demonstrated that supra-pharmacologic doses of metformin effect change  
373 through inhibition of mitochondrial ATP production, whereas pharmacological doses of metformin  
374 increase mitochondrial respiration and fission (62). The literature would suggest that our high-dose  
375 metformin (1 mg/mL) is a Complex I inhibitor, whereas low-dose metformin (0.2 mg/mL) activates

376 AMPK. Our work did not confirm or explore the mechanistic differences between these two doses,  
377 which would be a natural extension of this work in the SCA mouse model.

378 Metformin therapy has pleiotropic effects and a large number of molecular pathways are  
379 implicated in metformin's physiological effects, including reducing oxidative stress, inhibiting apoptosis,  
380 complex I inhibition, and AMPK activation (19,21,34,63). Pathway analysis of microarray data from SCA  
381 mice hearts compared to sham mice implicated AMPK signaling as the most significantly changed  
382 pathway in our model (Figure 1C). The rescue of cardiac dysfunction by metformin and AICAR suggests  
383 that additional AMPK activation is both possible and beneficial. Reciprocally, mice that were  
384 concomitantly treated with metformin and the AMPK inhibitor compound C had significantly lower EF  
385 than untreated arrest mice (Figure 3A). Unexpectedly, metformin + compound C mice had lower serum  
386 creatinine than the arrest mice, though these studies will need to be confirmed in larger cohorts  
387 (Supplemental Figure 4A). Despite this paradox, these data demonstrate that AMPK activation alone is  
388 sufficient to cause at least cardioprotection in our SCA model, and that metformin's cardioprotective  
389 benefits are negated by AMPK inhibition.

390 The downstream mechanisms underlying metformin's benefits in our model are difficult to fully  
391 elucidate, as both metformin and AMPK signaling have been implicated in a wide number of signaling  
392 cascades (21,27,64). However, we observed that the mitochondria in LVs of SCA mice are smaller and  
393 rounder than sham cohorts by electron microscopy, and that metformin-pretreated arrest mice have  
394 significantly larger mitochondria than untreated arrest mice (Figure 4), which suggest a possible role for  
395 alterations in either mitochondrial dynamics or mitophagy as regulators of mitochondrial morphology.  
396 Electron transport chain complex abundance estimates were largely unchanged between treatment  
397 groups, except for a mild elevation in complex II expression in the metformin-pretreated arrest mice  
398 over the sham cohort (Figure 4B). mtDNA copy number and damage were not significantly elevated in  
399 the untreated arrest mice when compared to sham, but metformin pretreatment did drive an increase  
400 in mtDNA copy number and a decrease in mtDNA damage when compared to the untreated arrest mice  
401 (Figure 4D). These data could support an increase in mitochondrial biogenesis or a change in  
402 mitochondrial turnover.

403 There were notable changes to markers of autophagy and mitochondrial dynamics, both of  
404 which have been implicated as altered pathways related to AMPK signaling (64–67). We found evidence  
405 of decreased expression levels of p-mTOR and p-S6 in untreated arrest, metformin sham, and metformin  
406 arrest groups when compared to sham mice as indicated (Figure 5B), which could indicate increased  
407 autophagic poise in the case of sham metformin hearts, and either poise or activation of autophagy in  
408 the arrest and metformin-pretreated arrest samples. Importantly, an increase in LC3-II/LC3-I occurred in  
409 arrest samples but was completely restored to baseline in metformin-pretreated arrest samples. P62,  
410 another marker of the autophagosome, was not significantly changed in the untreated arrest vs sham  
411 samples but was reduced in metformin-pretreated arrest mice compared to untreated arrest (Figure  
412 5B). These findings are consistent with an increase in autophagy with arrest, which was improved by  
413 either decreased mtDNA damage or increase autophagic clearance in the metformin arrest hearts.  
414 Because mtDNA damage levels increased in metformin-pretreated arrest hearts beyond control levels,  
415 the data suggest increased clearance of damaged mitochondria. SCA causes increased relative fission to  
416 untreated sham in heart, but metformin, which improves mitochondrial morphology, does not increase  
417 markers of fusion such as p-DRP1. It is unlikely that metformin pretreatment restores fusion, as MFN2  
418 and OPA1 are both further depleted in metformin arrest mice relative to the arrest mice. Importantly,

419 depletion of MFN2 and OPA1 is associated with the induction of autophagy (68), suggesting that  
420 clearance is enhanced in the metformin-treated SCA mice. Although this study lacks directed measures  
421 of mitochondrial flux, the data are consistent with that metformin pretreatment decreased proteotoxic  
422 stress in hearts and more efficient turnover of mitochondria and removal of damaged mtDNA, which  
423 increase the overall quality of the mitochondria at 24 hours post-arrest.

424 While metformin pretreatment has been shown to be cardioprotective, it is thus far not a  
425 clinically relevant model of therapeutic (post-arrest) intervention for SCA. There exists controversy  
426 about the benefits of acute metformin therapy in cardiac ischemia and metformin's role as a rescue  
427 therapy. Mouse studies of ischemia-reperfusion have demonstrated reduced infarct size when treated  
428 with metformin at the time of coronary artery ligation(52) or after ischemic insult(69). However, these  
429 benefits were not shown in a swine model of coronary artery ligation treated with metformin at the  
430 time of reperfusion(70). We attempted to treat our SCA mice with acute metformin via left-ventricular  
431 injection given at the time of reperfusion but found no evidence of cardiac (Figure 6) or renal  
432 (Supplemental Figure 4B) protection in this model (Figure 6). Our data do not prove, but are supportive  
433 of the idea, that metabolic adaptation is necessary to convey protection in a preventative setting.

434 To evaluate the clinical relevance of the cardiac and renal protection demonstrated with  
435 metformin pretreatment in our SCA mouse model, we performed a retrospective analysis of diabetic  
436 patients resuscitated from cardiac arrest. We divided these patients into metformin-treated and non-  
437 metformin-treated patients. Our primary endpoints were peak serum troponin within 24 hours post-  
438 arrest as a marker of cardiac damage and peak serum creatinine within the first 24 hours as a marker of  
439 kidney damage. Multiple regression analyses demonstrated a significant association between metformin  
440 pretreatment and decreased peak serum troponin and peak serum creatinine levels (Table 3). This  
441 suggests that metformin is driving cardiac and renal protection independently of other baseline  
442 characteristics. Previous studies have noted that improved renal function after arrest is predictive of  
443 long-term outcomes (7,8). It is not clear, however, whether or not early cardiac outcomes are predictive  
444 of survival (6,69). Our analysis was not powered to look for survival benefit in human subjects, but such  
445 a study is warranted.

446 In summary, we provide evidence in both a mouse model and retrospective clinical study that  
447 metformin pretreatment offers significant cardiac and renal protection acutely after SCA. Our SCA  
448 mouse involves cardiac injury without cardiac cell death, making it a more relevant system in which to  
449 study metformin's mechanism of action. Direct AMPK activation and inhibition studies confirmed that  
450 AMPK activation is necessary and sufficient for the cardiac and renal benefits observed with metformin  
451 treatment. A number of molecular mechanisms exist downstream of AMPK activation, and we have  
452 implicated changes to autophagy and mitochondrial dynamics in our mouse studies, though there were  
453 no dramatic changes to mitochondrial morphology or electron transport chain subunit expression.  
454 Future studies are warranted to investigate specific pathways downstream of metformin and AMPK that  
455 may be useful as an acute rescue therapy to replicate the cardiac and renal protection seen in our model  
456 and patient studies.

457

458

## 459 **Methods**

### 460 **Pre-clinical Data**

#### 461 **Sudden Cardiac Arrest Model**

462 Eight-week-old male and female C57BL/6J mice (Jackson Labs, Bar Harbor, ME, #000664)  
463 underwent cardiac arrest by delivery of potassium chloride (KCl) directly into the LV by percutaneous,  
464 ultrasound-guided needle injection as previously described (31). Briefly, mice were anesthetized using  
465 vaporized isoflurane (Henry Schein, Melville, NY, #1182097) and endotracheally intubated, then  
466 mechanically ventilated (MiniVent, Harvard Apparatus, Holliston, MA, #73-0043) at a rate of 150 bpm  
467 and volume of 125  $\mu$ L for females and 140  $\mu$ L for males. Body temperature was maintained by utilizing a  
468 rectal temperature probe and heating pad (Indus Instruments, Webster, TX, #THM150). The chest was  
469 cleaned of hair using Nair and sterilized with betadine prior to introduction of a 30-gauge needle into  
470 the LV under ultrasound guidance (Visual Sonics Vevo 3100 with Vevo LAB v 5.5.1 software, Toronto,  
471 Canada), followed by delivery of 40  $\mu$ L of 0.5M KCl to induce asystole. The ventilator was discontinued,  
472 and mice remained in asystole for a total of 8 minutes. 7.5 minutes after KCl dosing, 500  $\mu$ L of 15  $\mu$ g/mL  
473 epinephrine in saline (37°C) was injected into the LV over approximately 30 seconds. At 8 minutes, CPR  
474 was initiated by finger compression at about 300 bpm for 1-minute intervals. Electrocardiogram (ECG)  
475 was evaluated for return of sinus rhythm after each 1-minute interval. Animals not achieving ROSC by 3  
476 minutes after CPR initiation were euthanized. Mice remained on the ventilator until breathing frequency  
477 was greater than 60 times per minute. Sham mice received no KCl, but rather a single injection of  
478 epinephrine. All animals were placed in a recovery cage under a heat lamp after the procedure.

#### 479 **Animal Treatment Groups**

480 Treatment groups in the study were as follows: untreated sham, untreated cardiac arrest,  
481 metformin-pretreated sham, metformin-pretreated cardiac arrest, 5-aminoimidazole-4-carboxamide-1-  
482 beta-D-ribofuranoside (AICAR) pretreated cardiac arrest, metformin + compound c pretreated cardiac  
483 arrest, metformin rescue treatment cardiac arrest, and low-dose metformin pretreatment cardiac  
484 arrest. Metformin pretreatment consisted of *ad libitum* access to metformin (Major Pharmaceuticals,  
485 Livonia, MI, #48152) in drinking water (1 mg/mL) for 14 days prior to surgery. AICAR pretreated mice  
486 were given IP injections of 500 mg/kg AICAR (Toronto Research Chemicals, Toronto, CA, #A611700) in  
487 saline every other day for 14 days prior to surgery. Compound C pretreated mice were given 20 mg/kg IP  
488 injections of compound C (Cayman Chemical, Ann Arbor, MI, #11967) in saline daily for 14 days prior to  
489 arrest. Metformin rescue therapy was given as a single direct LV injection (1250  $\mu$ g/kg) dissolved in  
490 saline along with 500  $\mu$ L of 1mg/mL epinephrine (Par Pharmaceutical, Chestnut Ridge, NY, #10977) at  
491 the time of resuscitation. Low-dose metformin pretreatment consisted of *ad libitum* access to  
492 metformin in drinking water (0.2 mg/mL) for 14 days prior to surgery.

#### 493 **Echocardiography and Ultrasound**

494 Immediately prior to arrest surgery, mice were evaluated by transthoracic echocardiography  
495 using Vevo 3100 imaging systems (Visual Sonics) with a 40MHz probe. Repeat echocardiography was  
496 performed one day after arrest under isoflurane anesthesia delivered by nose cone. Heart rate was  
497 maintained between 400-500 bpm during imaging by adjusting isoflurane concentration. B-mode images  
498 taken from the parasternal long-axis were captured and LV EF calculated using modified Simpson's

499 methods (70). A cohort of all groups were assessed for renal perfusion after resuscitation. The  
500 ultrasound probe was oriented transversely across the abdomen at the plane of the right kidney and  
501 monitored for renal artery blood flow by doppler imaging. Image analysis was performed by a blinded  
502 sonographer (Vevo Lab 5.5.1, Visual Sonics).

### 503 **Tissue and Serum Collection**

504 After euthanasia with isoflurane and cervical dislocation, mice underwent cardiac puncture for  
505 collection of blood by heparinized syringe. Blood was separated by centrifugation at 2,000 x g at 4°C for  
506 10 minutes and the serum was flash frozen. These samples were evaluated for blood urea nitrogen  
507 (BUN), creatinine, alanine aminotransferase (ALT), and creatine kinase (CK) by the Kansas State  
508 Veterinary Diagnostic Laboratories (Manhattan, KS). Hearts from the mice were excised and LVs were  
509 isolated and flash frozen.

### 510 **Western Blot**

511 Frozen LV tissue was homogenized in lysis buffer containing a protease/phosphatase cocktail  
512 (Sigma-Aldrich, St. Louis, MO, #11697498001) and normalized for protein content using a BCA assay (Life  
513 Technologies, Carlsbad, CA, #23235). Samples were separated on NuPage 4-12% gradient SDS-PAGE gels  
514 (ThermoFisher, Waltham, MA, #WG1403BOX) and transferred onto iBlot nitrocellulose membranes  
515 (Invitrogen, #IB301001). Membranes were blocked in 5% milk for 1 hour and then incubated overnight  
516 at 4°C with primary antibodies, including OxPhos Rodent Antibody Cocktail 1:5000 (ThermoFisher,  
517 #458099), p-AMPK (Thr172, 1:1000, Cell Signaling, Danvers, MA, #2535), AMPK (1:1000, Cell Signaling,  
518 #2532), p-mTOR (Ser2448, 1:1000, Cell Signaling, #2971), DRP1 (1:1000, Cell Signaling, #5391), pDRP1  
519 (Ser616, 1:1000, Thermo, #PA5-64821), mTOR (1:1000, Cell Signaling, #2972), p-S6 (Ser240/244, 1:1000,  
520 Cell Signaling, #2215), S6 (1:1000, Cell Signaling, #2217), p-AKT (Ser473, 1:1000, Cell Signaling, #9271),  
521 AKT (1:1000, Cell Signaling, #9272), p62 (1:1000, Sigma-Aldrich, #P0067), and GAPDH (1:5000, Millipore,  
522 St. Louis, MO, #AB2302). Following incubation, membranes were washed with TBS-tween and then  
523 probed for 1 hour at room temperature with anti-mouse or anti-rabbit secondary antibodies (Jackson  
524 ImmunoResearch, West Grove, PA, #115-035-003 and #115-035-144). Images were obtained by  
525 developing on a ChemiDoc XRS imaging system (BioRad, Hercules, CA) and analyzed using ImageJ  
526 software (National Institutes of Health, Bethesda, MD).

### 527 **Tissue Histology**

528 Kidneys were fixed overnight in 10% formalin (Thermo, #SF100) at 4°C, then washed with PBS  
529 and transferred to 70% ethanol at room temperature. After fixation and dehydration, tissues were  
530 embedded in paraffin prior to sectioning at 4 µm by the Histology Core at the Children's Hospital of  
531 Pittsburgh. Sections were stained with hematoxylin and eosin (H&E). Renal tubular pathology was semi-  
532 quantitatively scored (0: no injury to 4: severe injury) in terms of tubular dilatation, formation of  
533 proteinaceous casts, and loss of brush border(71). Histological scoring was performed in a blinded  
534 fashion at 40x magnification on outer medullary regions of the tissue sections. Eight fields were  
535 evaluated per kidney (n=6-8 animals/group). Samples were imaged using a Leica DM 2500 microscope  
536 (Leica, Wetzlar, Germany) and analyzed with LAS X software (Leica).

### 537 **Transmission Electron Microscopy**

538 LV tissue was immersion fixed in 2.5% glutaraldehyde in 0.1M PBS overnight at 4°C. Fixed  
539 samples were washed 3x in PBS then post-fixed in aqueous 1% OsO<sub>4</sub>, 1% K<sub>3</sub>Fe(CN)<sub>6</sub> for 1 hour at room

540 temperature. Following 3 PBS washes, the pellet was dehydrated through a graded series of 30-100%  
541 ethanol, and then 100% propylene oxide then infiltrated in 1:1 mixture of propylene oxide:Polybed 812  
542 epoxy resin (Polysciences, Warrington, PA) for 1 hour. After several changes of 100% resin over 24  
543 hours, the samples were embedded in molds and cured at 37°C overnight, followed by additional  
544 hardening at 65°C for two more days. Semi-thin (300 nm) sections were heated onto glass slides, stained  
545 with 1% toluidine blue and imaged using light microscopy to assure proper tissue orientation. Ultrathin  
546 (60-70 nm) sections were collected on 100 mesh copper grids, and stained with 4% uranyl acetate for 10  
547 minutes, followed by 1% lead citrate for 7 min. Sections were imaged using a JEOL JEM 1400 PLUS  
548 transmission electron microscope (Peabody, MA) at 80 kV fitted with a side mount AMT digital camera  
549 (Advanced Microscopy Techniques, Danvers, MA). Twenty random images were obtained from sections  
550 throughout each LV. Individual mitochondria (n=50/sample) were randomly selected and traced for  
551 blinded quantification of size, roundness, and density via ImageJ (v1.8.0) software(72).

## 552 **RNA Isolation, qPCR, and Microarray Analysis**

553 Total genomic and mitochondrial DNA were isolated from frozen, powdered LV tissue. Tissue  
554 was homogenized in a buffer containing Proteinase K digestion buffer and proteinase K (Genesee  
555 Scientific, Genesee, NY, #42-700) overnight at 55°C, as previously described (73,74). The next day, DNA  
556 was purified by centrifuging the homogenized buffer with staged EtOH resuspension, followed by  
557 centrifugation and resuspension in TE buffer supplemented with RNase A (Invitrogen, #12091039). DNA  
558 concentration was measured using an AccuBlue Broad Range kit (Biotium, Fremont, CA, #31009).  
559 Relative mtDNA abundance was measured using a TaqMan primer/probe for mitochondrial ND1 (VIC-  
560 labeled; primer:probe 1:1) versus nuclear HDAC1 (FAM-labeled; primer:probe of 3:1; supplemental  
561 Table 1). Multiplex assessment of relative abundance of mtDNA was quantified using real-time  
562 quantitative PCR (qPCR) with TaqMan Fast Advanced Master Mix (ThermoFisher, #4444965) performed  
563 on QuantStudio 5 PCR system (Applied Biosystems). 4.6 ng of DNA was included in each reaction with 5  
564 µM of primers/probes in a 10 µL total reaction volume and calculated by the  $\Delta\Delta Cq$  method (75). The  
565 qPCR amplification profile was: one cycle (95°C for 20 seconds) followed by 40 cycles (95°C for 1 sec  
566 then 60°C for 20 seconds). All primers and probes were produced by Integrated DNA Technologies  
567 (Coralville, Iowa).

568  
569 mtDNA damage was assessed by comparing total PCR product after long-amplicon mtDNA  
570 replication with LongAmp Hot Start Taq Polymerase (New England Biolabs, Ipswich PA, #M0533;  
571 Supplemental Table 1)(76). 15 ng of DNA was amplified using the following profile: one cycle (94°C for 2  
572 minutes) followed by 17 cycles (94°C for 15 seconds then 64°C for 12 seconds) then 1 cycle (72°C for 10  
573 min)(77). Final product was measured by Accublu within the linear detection range. Specific DNA  
574 products were confirmed by gel electrophoresis.

575  
576 Microarray analysis was performed on cDNA through the Affymetrix microarray analysis service  
577 (ThermoFisher). Eight untreated sham and eight untreated arrest mice were included in these studies  
578 with an even distribution of males and females. Differential gene expression analysis was performed  
579 using Transcription Analysis Console (Thermofisher). Gene-level p-values less than 0.05 were considered  
580 significant for gene inclusion. Subsequent pathway analysis was performed to compare untreated sham  
581 and arrest groups through Ingenuity Pathway Analysis (Qiagen). Complete datasets were deposited in  
582 GEO (accession no. GSE176494).

## 583 584 **Statistical Analysis** 585



586 Data were expressed as mean  $\pm$  standard error in all figures.  $p \leq 0.05$  was considered significant  
587 for all comparisons. One-way ANOVA with either Dunnett's multiple comparisons test or Tukey's  
588 multiple comparisons post-hoc analysis was used to compare groups either to a single group or all  
589 groups as detailed in figure legends. All statistical analysis was completed using Graphpad Prism 8  
590 software (San Diego, CA).

## 591 **Clinical Data**

592

### 593 **Clinical Data Collection**

594

595 De-identified adult patients with a documented history of diabetes mellitus treated at a single  
596 academic medical center after resuscitation from cardiac arrest from January 2010 to December 2019  
597 were included in this study. Patients with a history of known kidney disease prior to arrest, patients who  
598 arrived at our facility over 24 hours after collapse, patients for whom home medications were unknown,  
599 patients who rearrested and died before blood work could be acquired, and patients resuscitated with  
600 extracorporeal support were excluded from analysis. Demographic and arrest characteristics from a  
601 prospective registry, including patient age, sex, shockable presenting arrest rhythm, witnessed arrest,  
602 layperson CPR, arrest duration, number of epinephrine doses administered, cardiac etiology of arrest,  
603 and Charlson Comorbidity Index were extracted. Admission pharmacy documentation in each patient's  
604 electronic medical record was evaluated to determine whether patients were prescribed metformin,  
605 insulin, or other oral antihyperglycemic medications prior to their arrest, and classified each of these as  
606 three independent binary predictors. The primary outcomes of interest were peak serum creatinine and  
607 peak serum troponin at 24 hours post-arrest.

### 608 **Clinical Statistical Analysis**

609 Baseline population characteristics and outcomes were summarized using descriptive statistics.  
610 Multiple imputation with chained equations with predictive mean matching was used to impute missing  
611 continuous variables. Generalized linear models with a gamma distribution and log link were used to  
612 test the association of metformin with peak 24-hour serum creatinine and peak 24-hour serum  
613 troponin. For primary adjusted analysis, covariates were included based on biological plausibility. A  
614 series of sensitivity analyses, including a backward stepwise model sequentially removing predictors  
615 with  $p < 0.1$ , complete case analysis, and adjusted modeling were performed, excluding patients receiving  
616 insulin who may be fundamentally sicker than those receiving no medications or oral antihyperglycemics  
617 only.

### 618 **Study Approvals**

619 All mouse studies were performed at the University of Pittsburgh in compliance with the  
620 National Institutes of Health Guidance for Care and Use of Experimental Animals. This protocol was  
621 approved by the University of Pittsburgh Animal Care and Use Committee (Protocol #18032212). The  
622 University of Pittsburgh Human Research Protection Office approved all aspects of the reported human  
623 subject's research with a waiver of informed consent due to its no greater than minimal risk to  
624 participants (STUDY19020205).

625 **Author Contributions**

626 CR, CD, and BK were responsible for conceptualization of these studies. CR designed the methodology  
627 and with CL and KR performed the investigation. CR and JE were responsible for data curation. Formal  
628 analyses were performed by CR, CL, TC, SSL, CD, and JE. Visualization was completed by TC and DS. CR,  
629 SSL, CD, JE, and BK wrote the manuscript. SSL and BK supervised the project, and BK provided resources  
630 for its completion. All authors reviewed the final manuscript and are responsible for its integrity.

631

632 **Acknowledgements**

633 Research reported in this manuscript was supported by: American Heart Association Transformational  
634 Project Award 18TPA34230048, NIH Instrument Grant for Advanced High-Resolution Rodent Ultrasound  
635 Imaging System 1S10OD023684-01A1, NIH Training Program in Imaging Sciences in Translational  
636 Cardiovascular Research 5T32HL129964-02, NIH 5K23NS097629 (to JE), and Richard K. Mellon Institute  
637 Award for postdoctoral trainees (to TC). Graphical abstract created with BioRender.com.

638

639

640 **References**

- 641 1. Aparicio HJ, Benjamin EJ, Callaway CW, et al. *Heart Disease and Stroke Statistics-2021 Update A*  
642 *Report from the American Heart Association.*; 2021. doi:10.1161/CIR.0000000000000950
- 643 2. Zipes D, Wellens HJJ. Sudden Cardiac Death. *Clin Cardiol.* Published online 1998:2334-2351.
- 644 3. Mongardon N, Dumas F, Ricome S, et al. Postcardiac arrest syndrome: from immediate  
645 resuscitation to long-term outcome. *Ann Intensive Care.* 2011;1(45):1-11.
- 646 4. Neumar RW, Nolan JP, Adrie C, et al. Post-cardiac arrest syndrome: Epidemiology,  
647 pathophysiology, treatment, and prognostication a consensus statement from the International  
648 Liaison Committee on Resuscitation. *Circulation.* 2008;118(23):2452-2483.  
649 doi:10.1161/CIRCULATIONAHA.108.190652
- 650 5. Ruiz-Bailén M, Aguayo De Hoyos E, Ruiz-Navarro S, et al. Reversible myocardial dysfunction after  
651 cardiopulmonary resuscitation. *Resuscitation.* 2005;66(2):175-181.  
652 doi:10.1016/j.resuscitation.2005.01.012
- 653 6. Chang WT, Ma MHM, Chien KL, et al. Postresuscitation myocardial dysfunction: Correlated  
654 factors and prognostic implications. *Intensive Care Med.* 2007;33(1):88-95. doi:10.1007/s00134-  
655 006-0442-9
- 656 7. Park YS, Choi YH, Oh JH, et al. Recovery from acute kidney injury as a potent predictor of survival  
657 and good neurological outcome at discharge after out-of-hospital cardiac arrest. *Crit Care.*  
658 2019;23(1):1-11. doi:10.1186/s13054-019-2535-1
- 659 8. Storm C, Krannich A, Schachtner T, et al. Impact of acute kidney injury on neurological outcome  
660 and long-term survival after cardiac arrest – A 10-year observational follow up. *J Crit Care.*  
661 2018;47:254-259. doi:10.1016/j.jcrc.2018.07.023
- 662 9. Maruthur NM, Tseng E, Hutfless S, Wilson LM, Suarez-cuervo C. Diabetes Medications as  
663 Monotherapy or Metformin-Based Combination Therapy for Type 2 Diabetes. *Ann Intern Med.*  
664 2016;164:740-751. doi:10.7326/M15-2650
- 665 10. Han Y, Xie H, Liu Y, Gao P, Yang X, Shen Z. Effect of metformin on all-cause and cardiovascular  
666 mortality in patients with coronary artery diseases: a systematic review and an updated  
667 meta-analysis. *Cardiovasc Diabetol.* 2019;18(96):1-16. doi:10.1186/s12933-019-0900-7
- 668 11. Stumvoll M, Nurjhan N, Perriello G, Dailey G, Gerich JE. Metabolic Effects of Metformin in Non-  
669 Insulin-Dependent Diabetes Mellitus. *N Engl J Med.* 1995;333(9):550-554.  
670 doi:10.1056/nejm199508313330903
- 671 12. Wiernsperger NF, Bailey CJ. The Antihyperglycaemic Effect of Metformin. *Drugs.* 1999;58:31-39.  
672 doi:10.2165/00003495-199958001-00009
- 673 13. Zhou G, Goodyear LJ, Moller DE, et al. Role of AMP-activated protein kinase in mechanism of  
674 metformin action Find the latest version: Role of AMP-activated protein kinase in mechanism of  
675 metformin action. *J Clin Invest.* 2001;108(8):1167-1174. doi:10.1172/JCI200113505.Introduction
- 676 14. Crowley MJ, Diamantidis CJ, Mcduffie JR, et al. Clinical Outcomes of Metformin Use in  
677 Populations With Chronic Kidney Disease , Congestive Heart Failure, or Chronic Liver Disease. *Ann*  
678 *Intern Med.* 2017;166:191-200. doi:10.7326/M16-1901

- 679 15. Bell S, Farran B, MCGurnaghan S, et al. Risk of acute kidney injury and survival in patients treated  
680 with Metformin: an observational cohort study. *BMC Nephrol.* 2017;18(163):1-8.  
681 doi:10.1186/s12882-017-0579-5
- 682 16. Hassan FI, Sc M, Didari T, et al. A Review on The Protective Effects of Metformin in Sepsis-  
683 Induced Organ Failure. 2020;21(4). doi:10.22074/cellj.2020.6286.Introduction
- 684 17. Jochmans S, Alphonsine JE, Chelly J, et al. Does metformin exposure before ICU stay have any  
685 impact on patients' outcome? A retrospective cohort study of diabetic patients. *Ann Intensive*  
686 *Care.* 2017;7(116):1-9. doi:10.1186/s13613-017-0336-8
- 687 18. Reitz K, Marroquin O, Zenati M, et al. Association Between Preoperative Metformin Exposure and  
688 Postoperative Outcomes in Adults With Type 2 Diabetes. *JAMA Surg.* 2020;155(6).  
689 doi:10.1001/jamasurg.2020.0416.Association
- 690 19. Cameron AR, Morrison VL, Levin D, et al. Anti-Inflammatory Effects of Metformin Irrespective of  
691 Diabetes Status. *Circ Res.* 2016;119:652-665. doi:10.1161/CIRCRESAHA.116.308445
- 692 20. Chen Q, Lesnefsky EJ. Metformin and myocardial ischemia and reperfusion injury: Moving toward  
693 "prime time" human use? *Transl Res.* 2020;229:1-4. doi:10.1016/j.trsl.2020.10.006
- 694 21. Higgins L, Palee S, Chattipakorn SC, Chattipakorn N. Effects of metformin on the heart with  
695 ischaemia-reperfusion injury: Evidence of its benefits from in vitro, in vivo and clinical reports.  
696 *Eur J Pharmacol.* 2019;858(April):172489. doi:10.1016/j.ejphar.2019.172489
- 697 22. Kim TT, Dyck JRB. Is AMPK the savior of the failing heart? *Trends Endocrinol Metab.*  
698 2015;26(1):40-48. doi:10.1016/j.tem.2014.11.001
- 699 23. Cao Y, Bojjireddy N, Kim M, et al. Activation of  $\gamma$ 2-AMPK suppresses ribosome biogenesis and  
700 protects against myocardial ischemia/reperfusion injury. *Circ Res.* 2017;121(10):1182-1191.  
701 doi:10.1161/CIRCRESAHA.117.311159
- 702 24. Zaha V, Qi D, Su K, et al. AMPK Is Critical for Mitochondrial Function during Reperfusion. *J Mol*  
703 *Cell Cardiol.* 2017;21(2):129-139. doi:10.1016/j.yjmcc.2015.12.032.AMPK
- 704 25. Sullivan J, Brocklehurst K, Marley A, Carey F, Carling D, Beri R. Inhibition of lipolysis and  
705 lipogenesis in isolated rat adipocytes with AICAR, a cell-permeable activator of AMP-activated  
706 protein kinase. *FEBS Lett.* 1994;353:33-36.
- 707 26. Liu X, Chhipa RR, Nakano I, Dasgupta B. The AMPK inhibitor compound C is a potent AMPK-  
708 independent antiangiogenic agent. *Mol Cancer Ther.* 2014;13(3):596-605. doi:10.1158/1535-  
709 7163.MCT-13-0579
- 710 27. Dyck JRB, Lopaschuk GD. AMPK alterations in cardiac physiology and pathology: enemy or ally? *J*  
711 *Physiol.* 2006;1:95-112. doi:10.1113/jphysiol.2006.109389
- 712 28. Paiva MA, Gonçalves LM, Providência LA, Davidson SM, Yellon DM, Mocanu MM. Transitory  
713 activation of AMPK at reperfusion protects the ischaemic-reperfused rat myocardium against  
714 infarction. *Cardiovasc Drugs Ther.* 2010;24(1):25-32. doi:10.1007/s10557-010-6222-3
- 715 29. Paiva MA, Rutter-Locher Z, Gonçalves LM, et al. Enhancing AMPK activation during ischemia  
716 protects the diabetic heart against reperfusion injury. *Am J Physiol - Hear Circ Physiol.*  
717 2011;300(6):2123-2134. doi:10.1152/ajpheart.00707.2010

- 718 30. Cates C, Rousselle T, Wang J, et al. Activated protein C protects against pressure overload-  
719 induced hypertrophy through AMPK signaling. *Biochem Biophys Res Commun.* 2018;495(4):1-18.  
720 doi:10.1016/j.bbrc.2017.12.125.Activated
- 721 31. Rutledge CA, Chiba T, Redding K, et al. A novel ultrasound-guided mouse model of sudden cardiac  
722 arrest. *PLoS One.* 2020;15(12):1-14. doi:10.1371/journal.pone.0237292
- 723 32. Lalau JD, Kajbaf F, Bennis Y, Hurtel-Lemaire AS, Belpaire F, De Broe ME. Metformin Treatment in  
724 Patients With Type 2 Diabetes and Chronic Kidney Disease Stages 3A, 3B, or 4. *Diabetes Care.*  
725 2018;41(3):547-553. doi:10.2337/dc17-2231
- 726 33. Lalau JD, Arnouts P, Sharif A, De Broe ME. Metformin and other antidiabetic agents in renal  
727 failure patients. *Kidney Int.* 2015;87(2):308-322. doi:10.1038/ki.2014.19
- 728 34. Mohsin AA, Chen Q, Quan N, et al. Mitochondrial complex I inhibition by metformin limits  
729 reperfusion injury. *J Pharmacol Exp Ther.* 2019;369(2):282-290. doi:10.1124/jpet.118.254300
- 730 35. Stein SC, Woods A, Jones NA, Davison MD, Cabling D. The regulation of AMP-activated protein  
731 kinase by phosphorylation. *Biochem J.* 2000;345(3):437-443. doi:10.1042/0264-6021:3450437
- 732 36. Corton JM, Gillespie JG, Hawley SA, Hardie DG. 5-Aminoimidazole-4-Carboxamide  
733 Ribonucleoside: A Specific Method for Activating AMP-Activated Protein Kinase in Intact Cells?  
734 *Eur J Biochem.* 1995;229(2):558-565. doi:10.1111/j.1432-1033.1995.tb20498.x
- 735 37. Karamanlidis G, Nascimben L, Couper GS, Shekar PS, Del Monte F, Tian R. Defective DNA  
736 replication impairs mitochondrial biogenesis in human failing hearts. *Circ Res.* 2010;106(9):1541-  
737 1548. doi:10.1161/CIRCRESAHA.109.212753
- 738 38. Ge Y, Shi X, Boopathy S, McDonald J, Smith AW, Chao LH. Two forms of Opa1 cooperate to  
739 complete fusion of the mitochondrial inner-membrane. *Elife.* 2020;9:1-22. doi:10.1101/739078
- 740 39. Marsboom G, Toth PT, Ryan JJ, et al. Dynamin-related protein 1-mediated mitochondrial mitotic  
741 fission permits hyperproliferation of vascular smooth muscle cells and offers a novel therapeutic  
742 target in pulmonary hypertension. *Circ Res.* 2012;110(11):1484-1497.  
743 doi:10.1161/CIRCRESAHA.111.263848
- 744 40. Xiong W, Ma Z, An D, et al. Mitofusin 2 participates in mitophagy and mitochondrial fusion  
745 against angiotensin II-induced cardiomyocyte injury. *Front Physiol.* 2019;10(APR):1-12.  
746 doi:10.3389/fphys.2019.00411
- 747 41. Benischke AS, Vasanth S, Miyai T, et al. Activation of mitophagy leads to decline in Mfn2 and loss  
748 of mitochondrial mass in Fuchs endothelial corneal dystrophy. *Sci Rep.* 2017;7(1):1-11.  
749 doi:10.1038/s41598-017-06523-2
- 750 42. Kanamori H, Naruse G, Yoshida A, et al. Metformin Enhances Autophagy and Provides  
751 Cardioprotection in  $\delta$ -Sarcoglycan Deficiency-Induced Dilated Cardiomyopathy. *Circ Hear Fail.*  
752 2019;12(4):1-13. doi:10.1161/CIRCHEARTFAILURE.118.005418
- 753 43. Xie Z, Lau K, Eby B, et al. Improvement of cardiac functions by chronic metformin treatment is  
754 associated with enhanced cardiac autophagy in diabetic OVE26 mice. *Diabetes.* 2011;60(6):1770-  
755 1778. doi:10.2337/db10-0351
- 756 44. Sciarretta S, Maejima Y, Zablocki D, Sadoshima J. The Role of Autophagy in the Heart. *Annu Rev*

- 757            *Physiol.* 2018;80:1-26. doi:10.1146/annurev-physiol-021317-121427
- 758    45.    Wu X, He L, Cai Y, et al. Induction of autophagy contributes to the myocardial protection of  
759            valsartan against ischemia-reperfusion injury. *Mol Med Rep.* 2013;8(6):1824-1830.  
760            doi:10.3892/mmr.2013.1708
- 761    46.    Seibenhener ML, Babu JR, Geetha T, Wong HC, Krishna NR, Wooten MW. Sequestosome 1/p62 Is  
762            a Polyubiquitin Chain Binding Protein Involved in Ubiquitin Proteasome Degradation. *Mol Cell*  
763            *Biol.* 2004;24(18):8055-8068. doi:10.1128/mcb.24.18.8055-8068.2004
- 764    47.    Li L, Xu J, He L, et al. The role of autophagy in cardiac hypertrophy. *Acta Biochim Biophys Sin*  
765            (*Shanghai*). 2016;48(6):491-500. doi:10.1093/abbs/gmw025
- 766    48.    Mizushima N, Yoshimori T. How to interpret LC3 immunoblotting. *Autophagy.* 2007;3(6):542-545.  
767            doi:10.4161/auto.4600
- 768    49.    Emelyanova L, Bai X, Yan Y, et al. Biphasic effect of metformin on human cardiac energetics.  
769            *Transl Res.* Published online 2020. doi:10.1016/j.trsl.2020.10.002
- 770    50.    Zhou G, Myers R, Li Y, et al. Role of AMP-activated protein kinase in mechanism of metformin  
771            action. *J Clin Invest.* 2001;108(8):1167-1174. doi:10.1172/JCI13505
- 772    51.    Lesnefsky EJ, Chen Q, Hoppel CL. Mitochondrial Metabolism in Aging Heart. *Circ Res.*  
773            2016;118(10):1593-1611. doi:10.1161/CIRCRESAHA.116.307505
- 774    52.    Wang X, Yang L, Kang L, et al. Metformin attenuates myocardial Ischemia-reperfusion injury via  
775            Up-regulation of antioxidant enzymes. *PLoS One.* 2017;12(8):1-13.  
776            doi:10.1371/journal.pone.0182777
- 777    53.    Whittington HJ, Hall AR, McLaughlin CP, Hausenloy DJ, Yellon DM, Mocanu MM. Chronic  
778            metformin associated cardioprotection against infarction: Not just a glucose lowering  
779            phenomenon. *Cardiovasc Drugs Ther.* 2013;27(1):5-16. doi:10.1007/s10557-012-6425-x
- 780    54.    Solskov L, Løfgren B, Kristiansen SB, et al. Metformin induces cardioprotection against  
781            ischaemia/reperfusion injury in the rat heart 24 hours after administration. *Basic Clin Pharmacol*  
782            *Toxicol.* 2008;103(1):82-87. doi:10.1111/j.1742-7843.2008.00234.x
- 783    55.    Gundewar S, Calvert, John W, Jha S, et al. Activation of AMPK by Metformin Improves Left  
784            Ventricular Function and Survival in Heart Failure. *Circ Res.* 2009;454(1):42-54.  
785            doi:10.1161/CIRCRESAHA.108.190918.Activation
- 786    56.    Calvert JW, Gundewar S, Jha S, et al. Acute metformin therapy confers cardioprotection against  
787            myocardial infarction via AMPK-eNOS- mediated signaling. *Diabetes.* 2008;57(3):696-705.  
788            doi:10.2337/db07-1098
- 789    57.    Bhamra GS, Hausenloy DJ, Davidson SM, et al. Metformin protects the ischemic heart by the Akt-  
790            mediated inhibition of mitochondrial permeability transition pore opening. *Basic Res Cardiol.*  
791            2008;103(3):274-284. doi:10.1007/s00395-007-0691-y
- 792    58.    Wang M, Weng X, Guo J, Chen Z, Jiang G, Liu X. Metformin alleviated EMT and fibrosis after renal  
793            ischemia-reperfusion injury in rats. *Ren Fail.* 2016;38(4):614-621.  
794            doi:10.3109/0886022X.2016.1149770
- 795    59.    Corremans R, Vervaet BA, D'haese PC, Neven E, Verhulst A. Metformin: A candidate drug for

- 796 renal diseases. *Int J Mol Sci.* 2019;20(1):1-15. doi:10.3390/ijms20010042
- 797 60. Li J, Gui Y, Ren J, et al. Metformin protects against cisplatin-induced tubular cell apoptosis and  
798 acute kidney injury via AMPK $\alpha$ -regulated autophagy induction. *Sci Rep.* 2016;6(April):1-11.  
799 doi:10.1038/srep23975
- 800 61. Cao J, Meng S, Chang E, et al. Low concentrations of metformin suppress glucose production in  
801 hepatocytes through AMP-activated protein kinase (AMPK). *J Biol Chem.* 2014;289(30):20435-  
802 20446. doi:10.1074/jbc.M114.567271
- 803 62. Wang Y, An H, Liu T, et al. Metformin Improves Mitochondrial Respiratory Activity through  
804 Activation of AMPK. *Cell Rep.* 2019;29(6):1511-1523.e5. doi:10.1016/j.celrep.2019.09.070
- 805 63. Lesnefsky EJ, Chen Q, Tandler B, Hoppel CL. Mitochondrial Dysfunction and Myocardial Ischemia-  
806 Reperfusion: Implications for Novel Therapies. *Annu Rev Pharmacol Toxicol.* 2017;57:535-565.  
807 doi:10.1146/annurev-pharmtox-010715-103335
- 808 64. Moussa A, Li J. AMPK in myocardial infarction and diabetes: the yin/yang effect. *Acta Pharm Sin*  
809 *B.* 2012;2(4):368-378. doi:10.1016/j.apsb.2012.06.001
- 810 65. Takagi H, Matsui Y, Hirotsu S, Sakoda H, Asano T, Sadoshima J. AMPK mediates autophagy during  
811 myocardial ischemia in vivo. *Autophagy.* 2007;3(4):405-407. doi:10.4161/auto.4281
- 812 66. Toyama E, Herzig S, Courchet J, et al. AMP-activated protein kinase mediates mitochondrial  
813 fission in response to energy stress. *Sci Rep.* 2016;351(6270):275-282.
- 814 67. Wang Q, Wu S, Zhu H, et al. Deletion of PRKAA triggers mitochondrial fission by inhibiting the  
815 autophagy-dependent degradation of DNM1L. *Autophagy.* 2017;13(2):404-422.  
816 doi:10.1080/15548627.2016.1263776
- 817 68. Vásquez-Trincado C, García-Carvajal I, Pennanen C, et al. Mitochondrial dynamics, mitophagy and  
818 cardiovascular disease. *J Physiol.* 2016;594(3):509-525. doi:10.1113/JP271301
- 819 69. Jentzer JC, Chonde MD, DeZfulian C. Myocardial Dysfunction and Shock after Cardiac Arrest.  
820 *Biomed Res Int.* 2015;2015:1-14.
- 821 70. Lang RM, Bierig M, Devereux RB, et al. Recommendations for chamber quantification: A report  
822 from the American Society of Echocardiography's guidelines and standards committee and the  
823 Chamber Quantification Writing Group, developed in conjunction with the European Association  
824 of Echocardiography. *J Am Soc Echocardiogr.* 2005;18(12):1440-1463.  
825 doi:10.1016/j.echo.2005.10.005
- 826 71. Chiba T, Peasley KD, Cargill KR, et al. Sirtuin 5 regulates proximal tubule fatty acid oxidation to  
827 protect against AKI. *J Am Soc Nephrol.* 2019;30(12):2384-2398. doi:10.1681/ASN.2019020163
- 828 72. Schneider CA, Rasband WS, Eliceiri KW. NIH Image to ImageJ: 25 years of image analysis. *Nat*  
829 *Methods.* 2012;9(7):671-675. doi:10.1038/nmeth.2089
- 830 73. Kolesar JE, Wang CY, Taguchi Y V, Chou S, Kaufman BA. Two-dimensional intact mitochondrial  
831 DNA agarose electrophoresis reveals the structural complexity of the mammalian mitochondrial  
832 genome. 2013;41(4):1-14. doi:10.1093/nar/gks1324
- 833 74. Falabella M, Kolesar JE, Wallace C, et al. G-quadruplex dynamics contribute to regulation of  
834 mitochondrial gene expression. *Sci Rep.* 2019;9(5605):1-17. doi:10.1038/s41598-019-41464-y



- 835 75. Livak KJ, Schmittgen TD. Analysis of relative gene expression data using real-time quantitative  
836 PCR and the  $2^{-\Delta\Delta CT}$  method. *Methods*. 2001;25(4):402-408. doi:10.1006/meth.2001.1262
- 837 76. Gonzalez-Hunt CP, Rooney JP, Ryde IT, Anbalagan C, Joglekar R, Meyer JN. PCR-Based Analysis of  
838 Mitochondrial DNA Copy Number, Mitochondrial DNA Damage, and Nuclear DNA Damage. *Curr*  
839 *Protoc Toxicol*. 2016;67(1):20.11.1-20.11.25. doi:10.1002/0471140856.tx2011s67
- 840 77. Furda AM, Bess AS, Meyer JN, Van Houten B. Analysis of DNA damage and repair in nuclear and  
841 mitochondrial DNA of animal cells using quantitative PCR. *Methods Mol Biol*. 2012;920:111-132.  
842 doi:10.1007/978-1-61779-998-3-9
- 843
- 844

845 **Figures and figure legends**

846

847 **Figure 1. Mouse model of sudden cardiac arrest (SCA) and Microarray Pathway Analysis.** A) Cartoon  
848 representation of direct left ventricular injection of potassium chloride (KCl) to cause asystole with  
849 representative ultrasound image of needle guidance. B) Time course of SCA protocol. C) Pathway  
850 analysis of microarray data from left ventricles collected one day after SCA (n=8) versus sham (n=8)  
851 surgeries, demonstrating the ten most significantly changed canonical signaling pathways by Ingenuity  
852 Pathway Analysis (IPA). LV, left ventricle; ROSC, return of spontaneous circulation.

853

854 **Figure 2. Metformin treated mice have preserved ejection fraction (EF) and lower kidney damage than**  
855 **untreated mice one day after sudden cardiac arrest (SCA).** A) At baseline, there is no difference in EF  
856 between treatment groups. One day after SCA, EF in arrest mice (n=20) is significantly lower than sham  
857 mice (n=15). Metformin pretreatment did not change EF in mice receiving sham surgery (n=8), but  
858 metformin pretreatment did lead to higher EF at 24 hours post-SCA (n=20) when compared to untreated  
859 arrest mice. B) Representative histologic sections from untreated sham and untreated arrest mice  
860 demonstrating proteinaceous casts in renal tubules (black stars) and infiltrates (white arrowheads) with  
861 glomeruli marked (white X's). Scale bar = 50  $\mu$ M. C) Markers of kidney damage, including serum  
862 creatinine, blood urea nitrogen (BUN), and histologic tubular injury score demonstrate significant injury  
863 in untreated arrest mice. Untreated sham (n=8) and metformin treated sham (n=6) mice have no  
864 evidence of damage. Metformin treated arrest mice (n=7) have significantly lower creatinine and tubular  
865 injury score than untreated arrest mice (n=8). D) There is no change in renal ischemic duration between  
866 untreated arrest and metformin treated arrest mice. E) Western blot analysis of pAMPK/AMPK in arrest  
867 mice pretreated with metformin when compared to sham, untreated arrest, and metformin-pretreated  
868 sham groups demonstrating increased p-AMPK/AMPK and p-AMPK/GAPDH (n=6 for all groups). Data are  
869 expressed as mean  $\pm$  SEM. P-values: \* < 0.05, \*\* < 0.01, \*\*\* < 0.001 by one-way ANOVA with Tukey post-  
870 hoc analysis. EF, ejection fraction; BUN, blood urea nitrogen.

871

872 **Figure 3. AMPK activation alone improves cardiac outcomes after SCA, and AMPK activation is**  
873 **necessary to exert metformin's cardioprotection.** A) SCA mice pretreated with the AMPK-activator  
874 AICAR (Arrest AICAR; n=9) have improved EF when compared to untreated arrest mice (n=15; data  
875 presented in Figure 2). Mice pretreated with both metformin and the AMPK-inhibitor Compound C  
876 (Arrest Met + Comp C; n=9) have decreased EF when compared to untreated arrest mice. B) AICAR  
877 treatment causes significant p-AMPK/AMPK elevation when compared to untreated arrest mice (n=6 for  
878 all groups). Data are expressed as mean  $\pm$  SEM. P-values: \* < 0.05, \*\* < 0.01, \*\*\* < 0.001 by one-way  
879 ANOVA with Dunnett's post-hoc analysis (A) or Tukey post-hoc analysis (B). AICAR, 5-aminoimidazole-4-  
880 carboxamide-1- $\beta$ -D-ribofuranoside; Comp C, Compound C; EF, ejection fraction.

881

882 **Figure 4. Metformin affects mitochondrial characteristics after SCA.** A) Representative electron  
883 microscope images of intrafibrillar mitochondria in untreated sham, untreated arrest, and metformin  
884 pretreated arrest mice one day after surgery (40,000x magnification). B) Mitochondria are smaller and

885 more circular in untreated arrest and metformin treated arrest mice when compared to sham, and  
886 metformin treated arrest mice have larger mitochondria than untreated arrest mice (n=50 per group). C)  
887 Electron transport chain expression is largely unchanged between treatment groups, with the exception  
888 of complex II (CII) expression in metformin-pretreated arrest mice being significantly higher than  
889 untreated sham mice one day after arrest (n=6/group, normalized to ponceau stain). D) mtDNA copy  
890 number is increased and has less damage in metformin treated arrest mice (n=7) when compared to  
891 untreated arrest mice (n=5). Untreated arrest mice had no changes to mtDNA copy number or damage  
892 when compared to sham. Data are expressed as mean  $\pm$  SEM. P-values: \* < 0.05, \*\* < 0.01, \*\*\* < 0.001 by  
893 one-way ANOVA with Tukey post-hoc analysis. ND1, NADH dehydrogenase 1; HDAC1, Histone  
894 deacetylase 1; mtDNA, mitochondrial DNA; WT, wild-type.

895

896 **Figure 5. Metformin pretreatment affects autophagy and mitochondrial dynamics after sudden**  
897 **cardiac arrest (SCA).** A) Representative western blot images of markers of mitochondrial fission and  
898 fusion. Mitofusin 2 (MFN2) is significantly depressed in metformin treated arrest mice (n=6) compared  
899 to untreated sham (n=6), untreated arrest (n=6), and sham metformin (n=5) groups. OPA1 is significantly  
900 depressed in metformin treated arrest compared to untreated arrest mice. There is no significant  
901 change to p-DRP expression between groups. B) Representative western blot images of autophagy  
902 related proteins downstream of AMPK. p-mTOR expression is reduced in untreated arrest, metformin  
903 treated sham, and metformin treated arrest mice when compared to untreated sham, and metformin  
904 treated mice have lower total mTOR than untreated sham and arrest groups. p-S6, a marker of mTOR  
905 activity, is also reduced in untreated arrest and metformin treated arrest mice when compared to sham.  
906 S6 expression is increased in sham metformin mice, but depressed in metformin arrest mice compared  
907 to sham, while the p-S6/S6 ratio is only significantly changed in the untreated arrest mice when  
908 compared to sham. P62, a marker of autophagosome formation, is lower in metformin treated arrest  
909 mice compared to untreated arrest mice. Untreated arrest mice have significantly elevated LC3II/LC3I, a  
910 marker of autophagy, compared to sham mice and metformin treated arrest mice (n=6/group). Data are  
911 expressed as mean  $\pm$  SEM. P-values: \* < 0.05, \*\* < 0.01, \*\*\* < 0.001 by one-way ANOVA with Tukey post-  
912 hoc analysis for all groups, except for the p-S6 analyses, which used Dunnett's post-hoc analysis. DRP,  
913 dynamin-related protein1; LC3, microtubule-associated protein light chain; MFN2, mitofusin 2; mTOR,  
914 mechanistic target of rapamycin; OPA1, dynamin-like 120 kDa protein, mitochondrial.

915

916 **Figure 6. Metformin does not work as a rescue therapy following arrest.** A) When given concomitantly  
917 with epinephrine, intravenous metformin (n=6) did not demonstrate any change to ejection fraction (EF)  
918 when compared to untreated arrest mice (n=15; data presented in Figure 2) or metformin treated arrest  
919 mice (n=20, data presented in Figure 2). P-values: \* < 0.05 by one-way ANOVA with Tukey post-hoc  
920 analysis.

921

922 **Figure 7. Summary of clinical inclusion and exclusion data for retrospective analysis of the Pittsburgh**  
923 **Post-Cardiac Arrest Service patient database.** Primary outcomes evaluated included peak serum  
924 troponin and peak serum creatinine in diabetic patients with and without a history of metformin  
925 therapy.

926

927 **Figure 8. Distributions of peak 24-hour serum troponin and peak 24-hour serum creatinine for diabetic**  
928 **patients with and without metformin therapy prior to arrest.** Dashed lines represent median values  
929 and dotted lines represent upper and lower quartiles.

930

931

932

933 **Table Legends**

934

935 **Table 1. Surgical data for arrest mice.** There are no significant changes to body weight or body  
936 temperature at time of extubation between treatment groups. There is no change in time to return of  
937 spontaneous circulation (ROSC) or time to extubation between untreated arrest and treated arrest  
938 groups. There is no change to random blood glucose 24-hours after arrest between sham, untreated  
939 arrest, and metformin pretreated arrest mice. Data are presented as mean  $\pm$  SEM unless otherwise  
940 noted. Analysis by one-way ANOVA with Tukey post-hoc analysis.

941

942 **Table 2. Baseline demographics and clinical characteristics.** Data are presented as mean  $\pm$  standard  
943 deviation, median [interquartile range], or sample number (corresponding percentage).

944

945 **Table 3. Association between metformin use and peak serum creatine and troponin by log link model.**  
946 Model was adjusted for age, sex, arrest location (in- vs out-of-hospital), witnessed collapse, layperson  
947 cardiopulmonary resuscitation, presenting rhythm, arrest duration, number of epinephrine  
948 administered, cardiac etiology of arrest, Charlson Comorbidity index, insulin, and other oral diabetic  
949 medications. Both peak serum creatinine level and peak serum troponin level 24 hours post-arrest are  
950 significantly associated with history of metformin use.

951

952

953

954

955

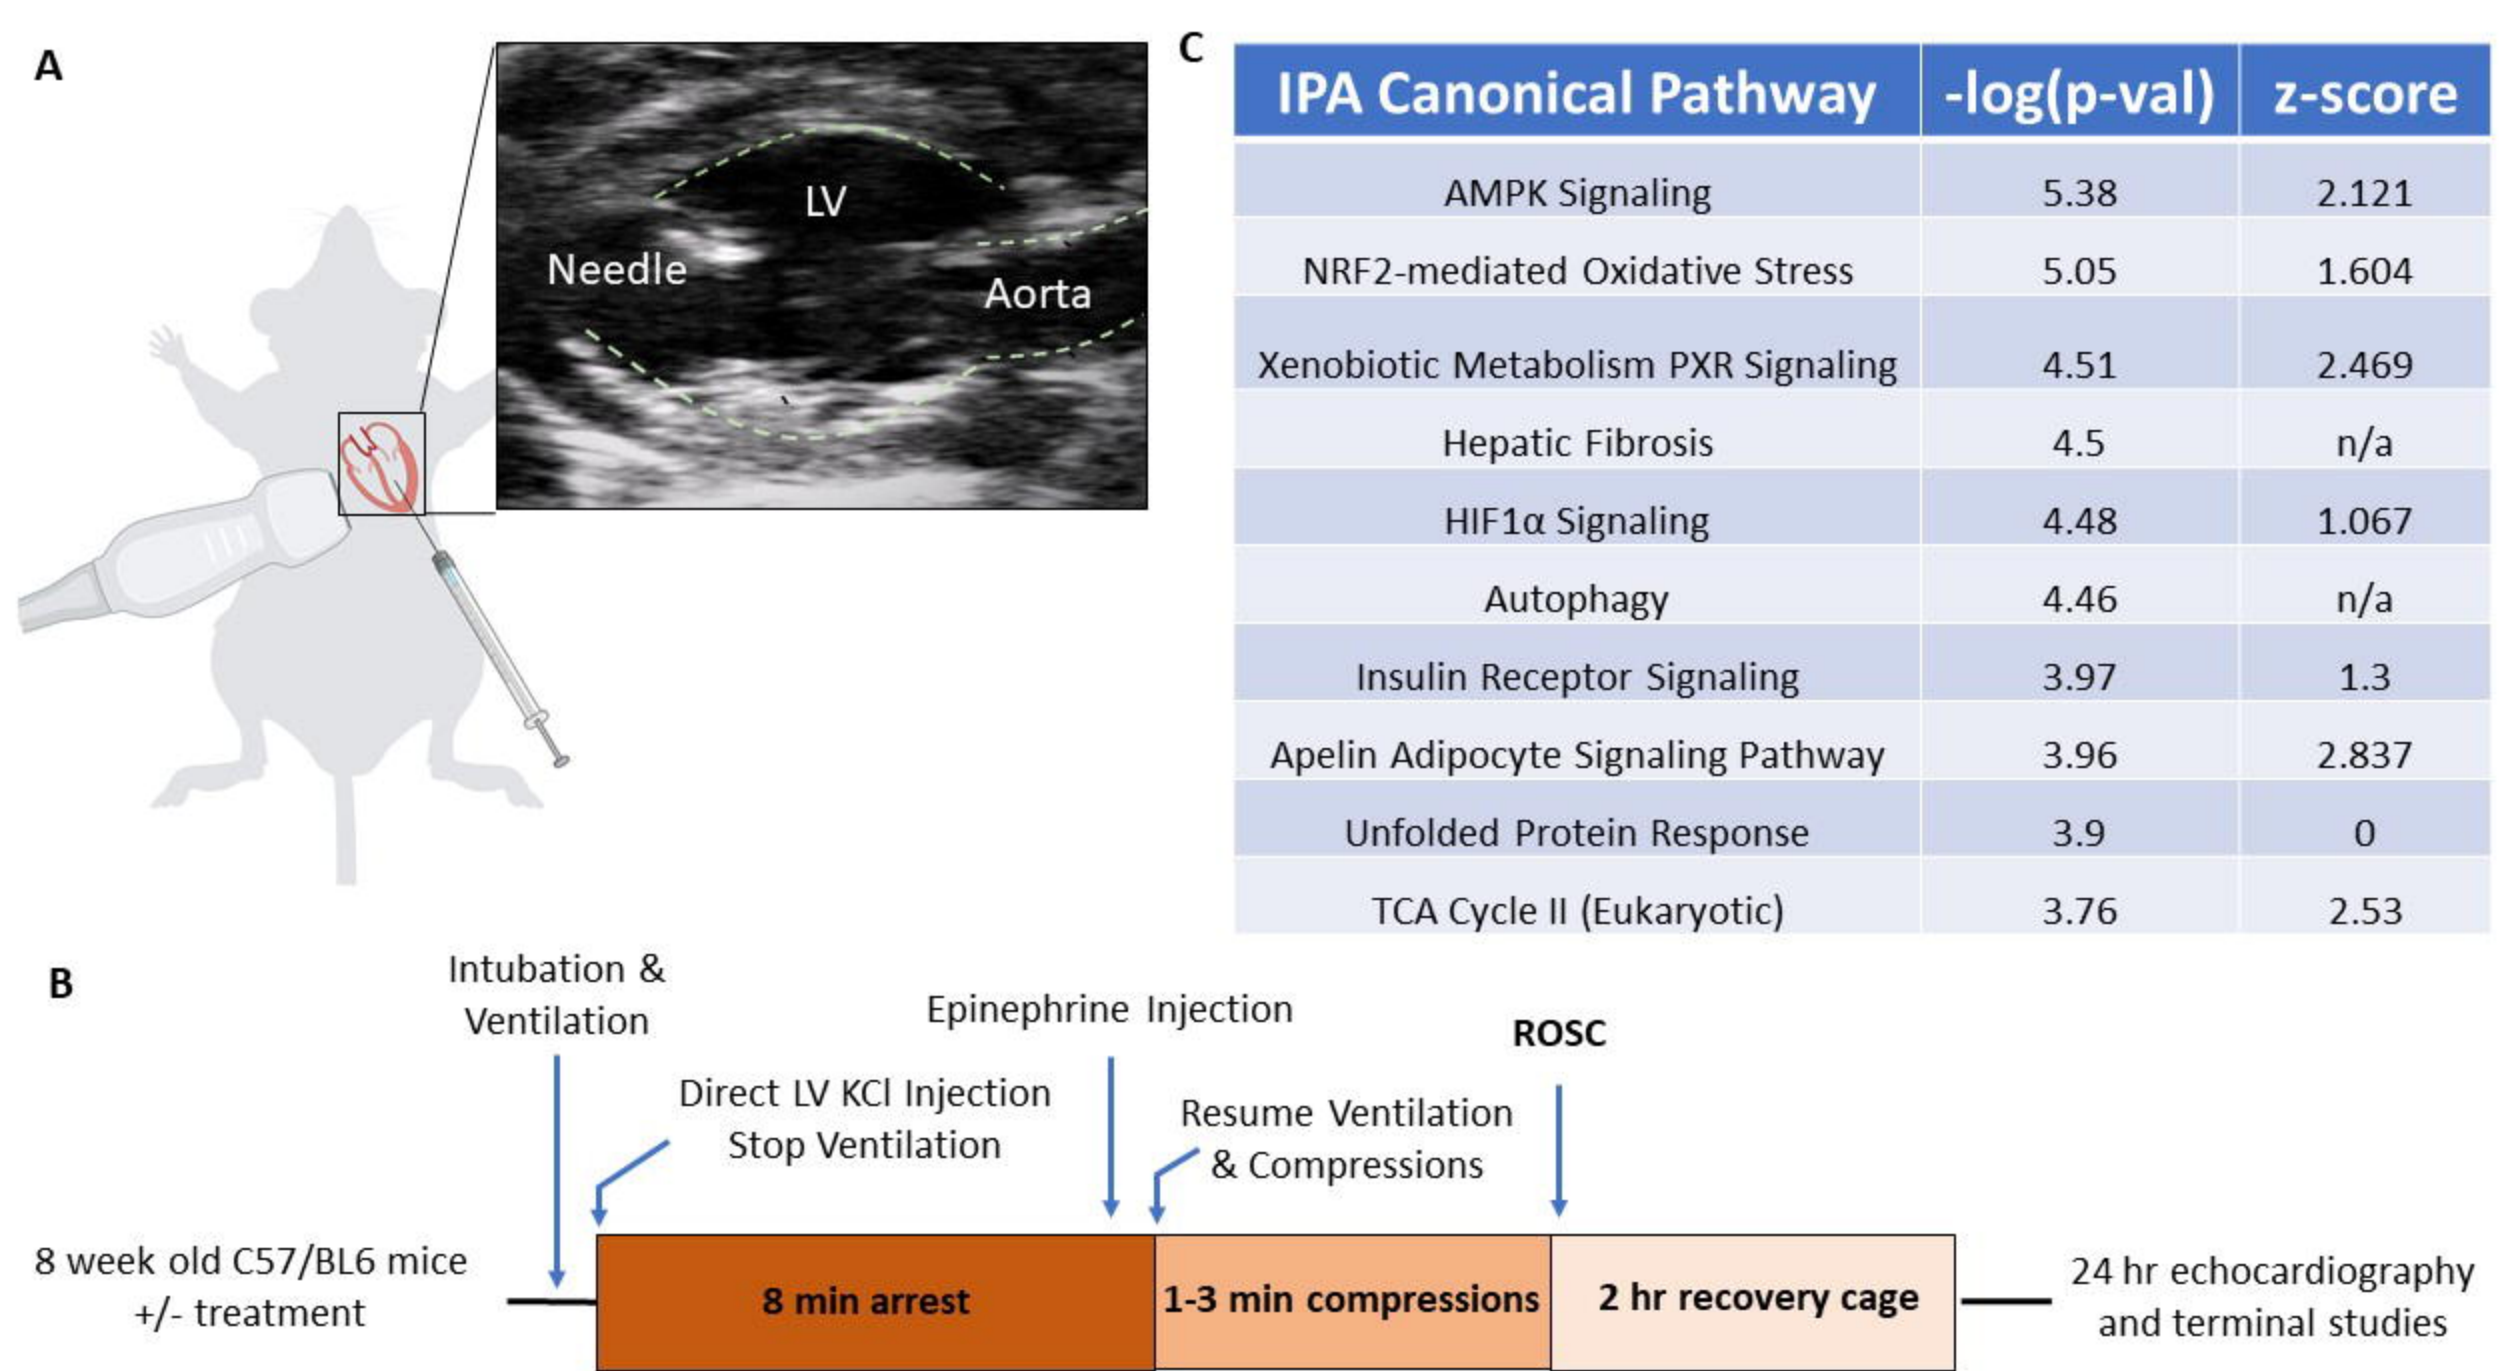

**Figure 1. Mouse model of sudden cardiac arrest (SCA) and Microarray Pathway Analysis.** A) Cartoon representation of direct left ventricular injection of potassium chloride (KCl) to cause asystole with representative ultrasound image of needle guidance. B) Time course of SCA protocol. C) Pathway analysis of microarray data from left ventricles collected one day after SCA (n=8) versus sham (n=8) surgeries, demonstrating the ten most significantly changed canonical signaling pathways by Ingenuity Pathway Analysis (IPA). LV, left ventricle; ROSC, return of spontaneous circulation.

bioRxiv preprint doi: <https://doi.org/10.1101/2021.08.24.457506>; this version posted August 25, 2021. The copyright holder for this preprint (which was not certified by peer review) is the author/funder. All rights reserved. No reuse allowed without permission.

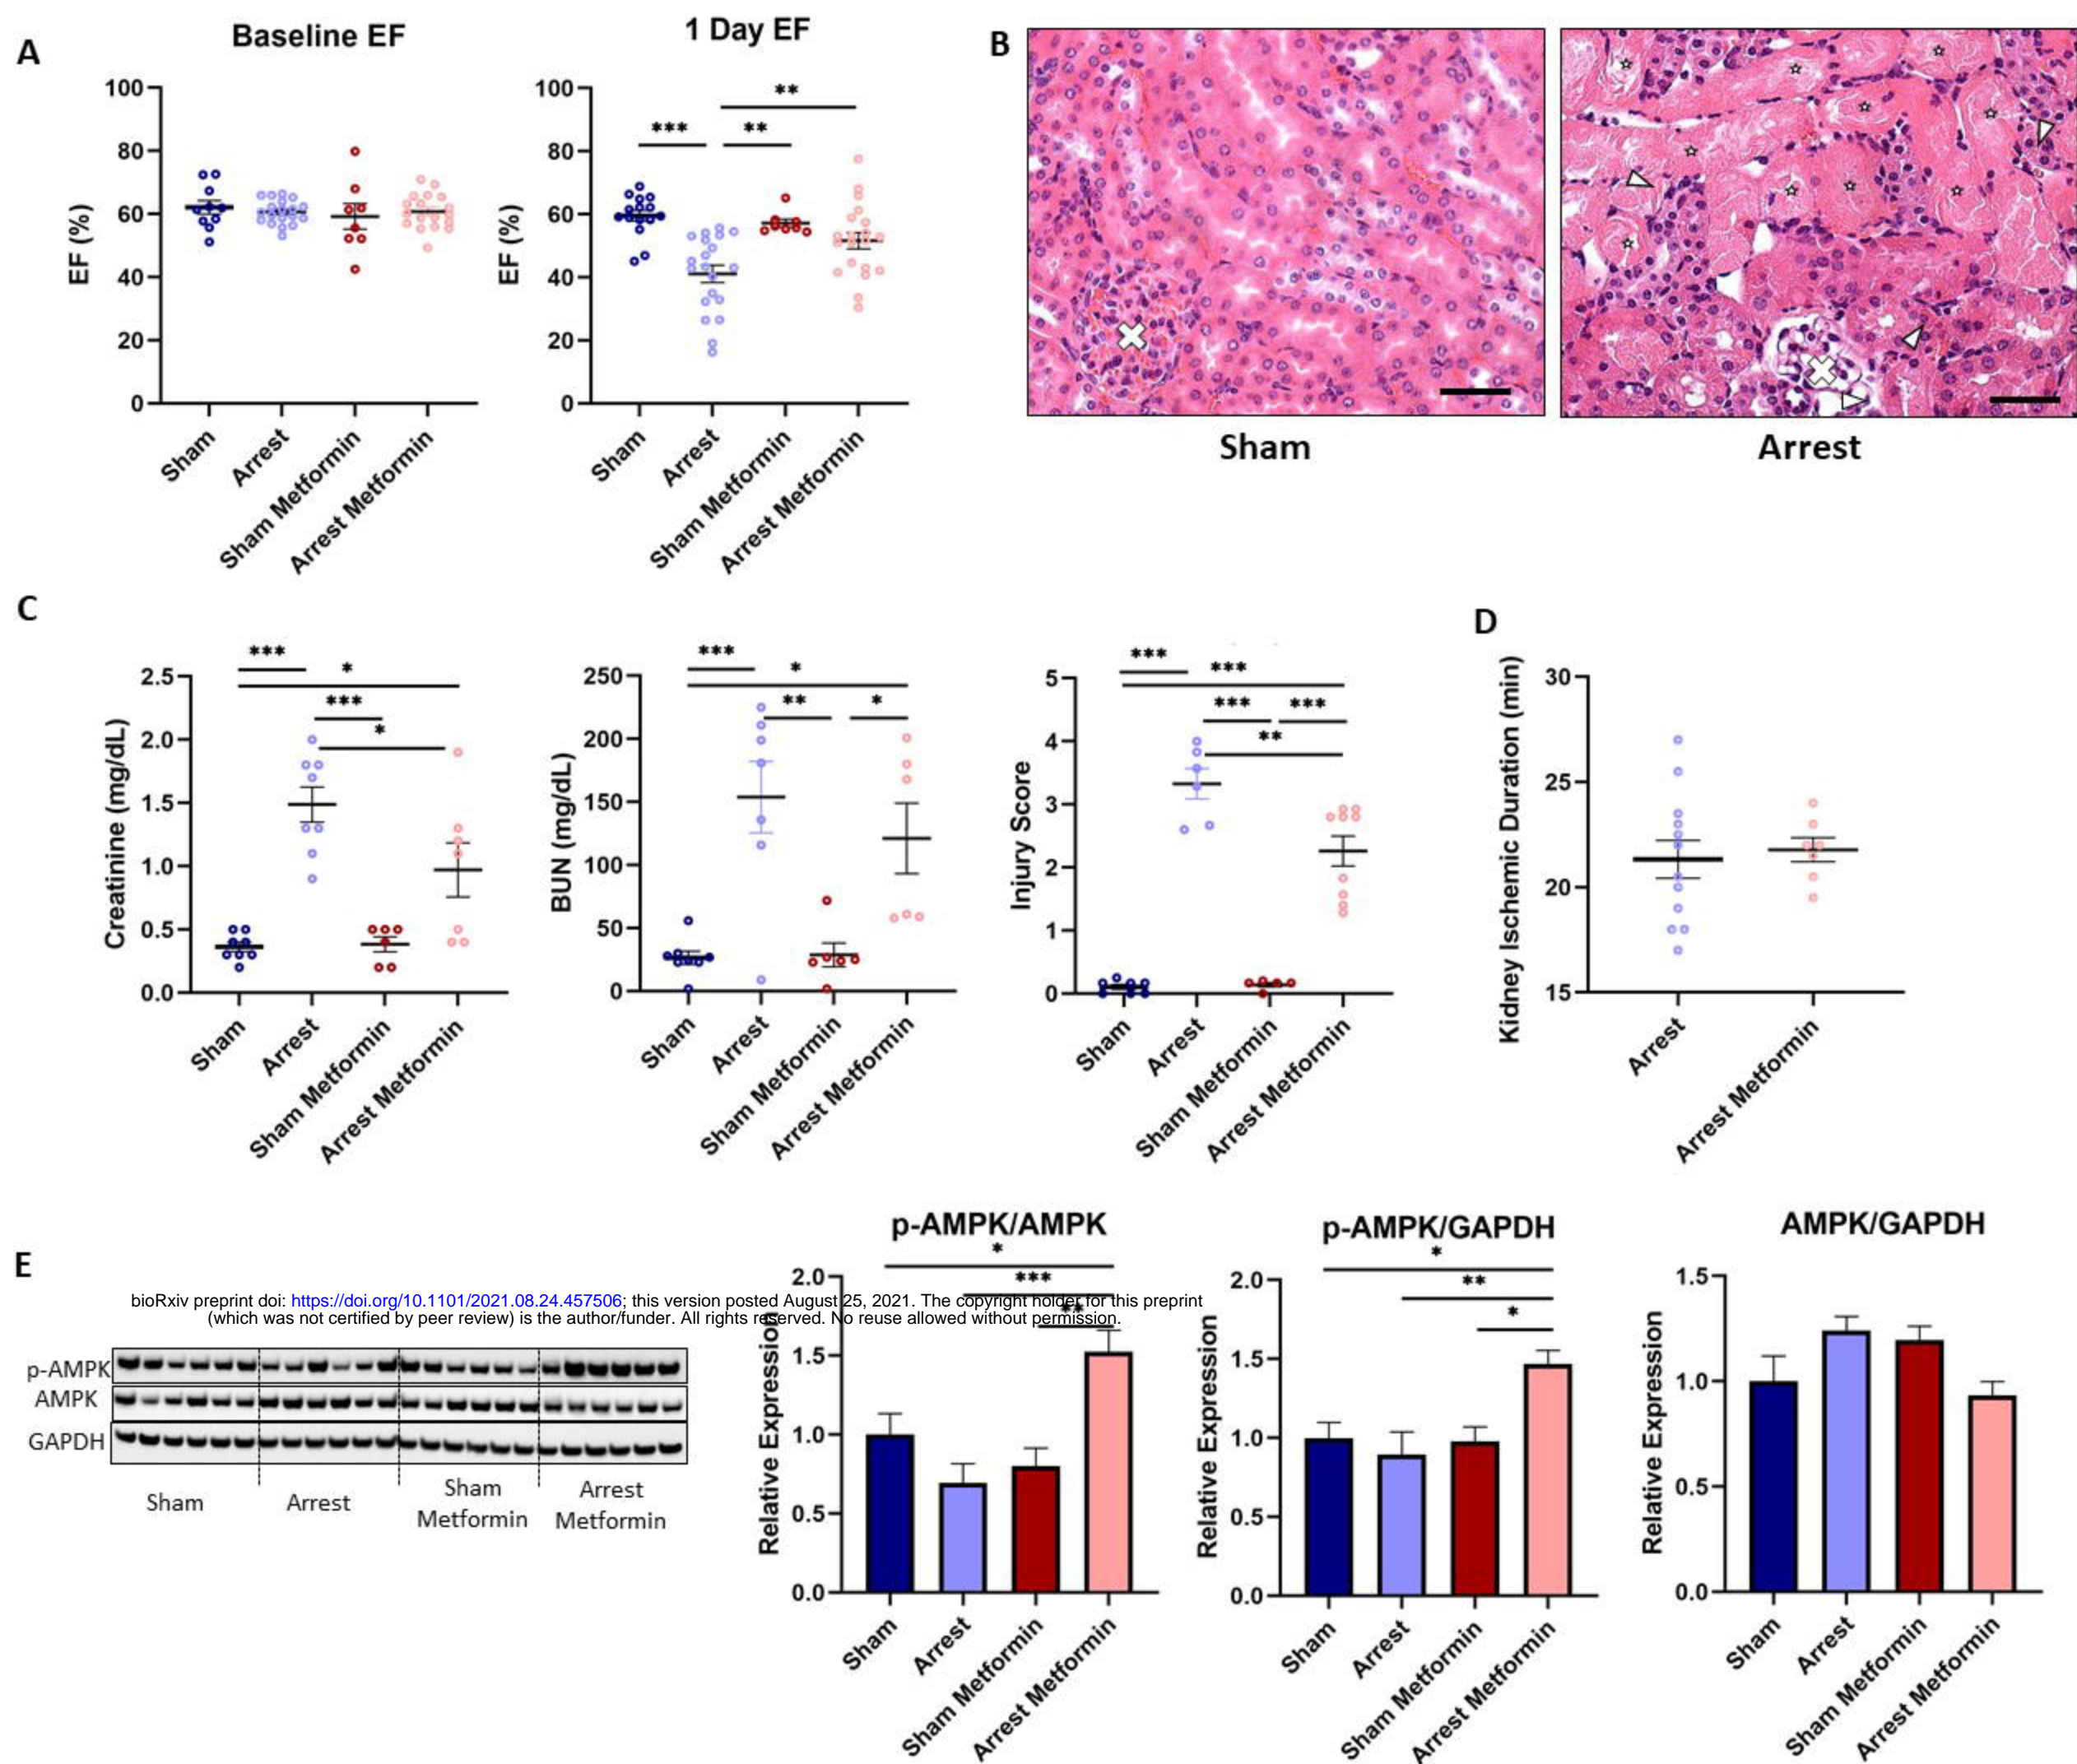

**Figure 2. Metformin treated mice have preserved ejection fraction (EF) and lower kidney damage than untreated mice one day after sudden cardiac arrest (SCA).** A) At baseline, there is no difference in EF between treatment groups. One day after SCA, EF in arrest mice (n=20) is significantly lower than sham mice (n=15). Metformin pretreatment did not change EF in mice receiving sham surgery (n=8), but metformin pretreatment did lead to higher EF at 24 hours post-SCA (n=20) when compared to untreated arrest mice. B) Representative histologic sections from untreated sham and untreated arrest mice demonstrating proteinaceous casts in renal tubules (black stars) and infiltrates (white arrowheads) with glomeruli marked (white X's). Scale bar = 50  $\mu$ M. C) Markers of kidney damage, including serum creatinine, blood urea nitrogen (BUN), and histologic tubular injury score demonstrate significant injury in untreated arrest mice. Untreated sham (n=8) and metformin treated sham (n=6) mice have no evidence of damage. Metformin treated arrest mice (n=7) have significantly lower creatinine and tubular injury score than untreated arrest mice (n=8). D) There is no change in renal ischemic duration between untreated arrest and metformin treated arrest mice. E) Western blot analysis of pAMPK/AMPK in arrest mice pretreated with metformin when compared to sham, untreated arrest, and metformin-pretreated sham groups demonstrating increased p-AMPK/AMPK and p-AMPK/GAPDH (n=6 for all groups). Data are expressed as mean  $\pm$  SEM. P-values: \* < 0.05, \*\* < 0.01, \*\*\* < 0.001 by one-way ANOVA with Tukey post-hoc analysis. EF, ejection fraction; BUN, blood urea nitrogen.

A

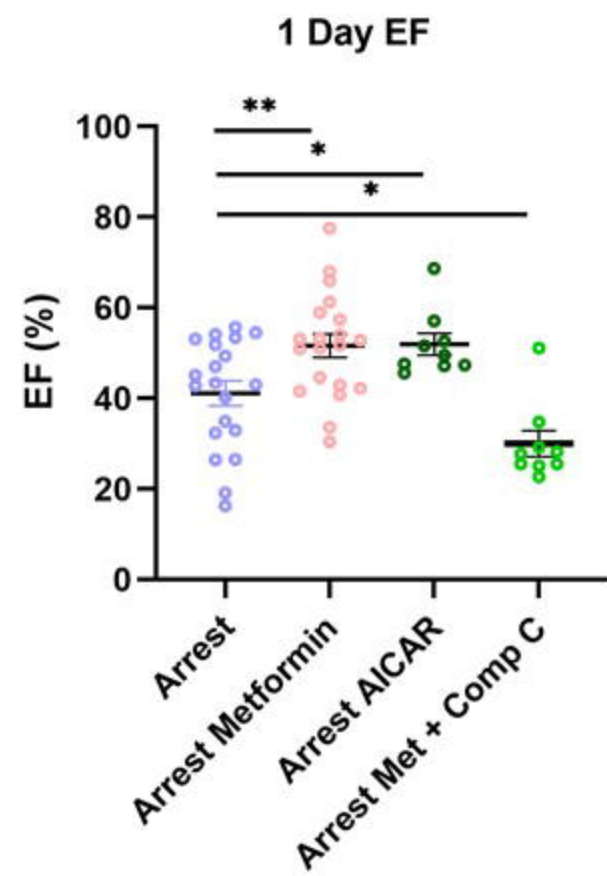

B

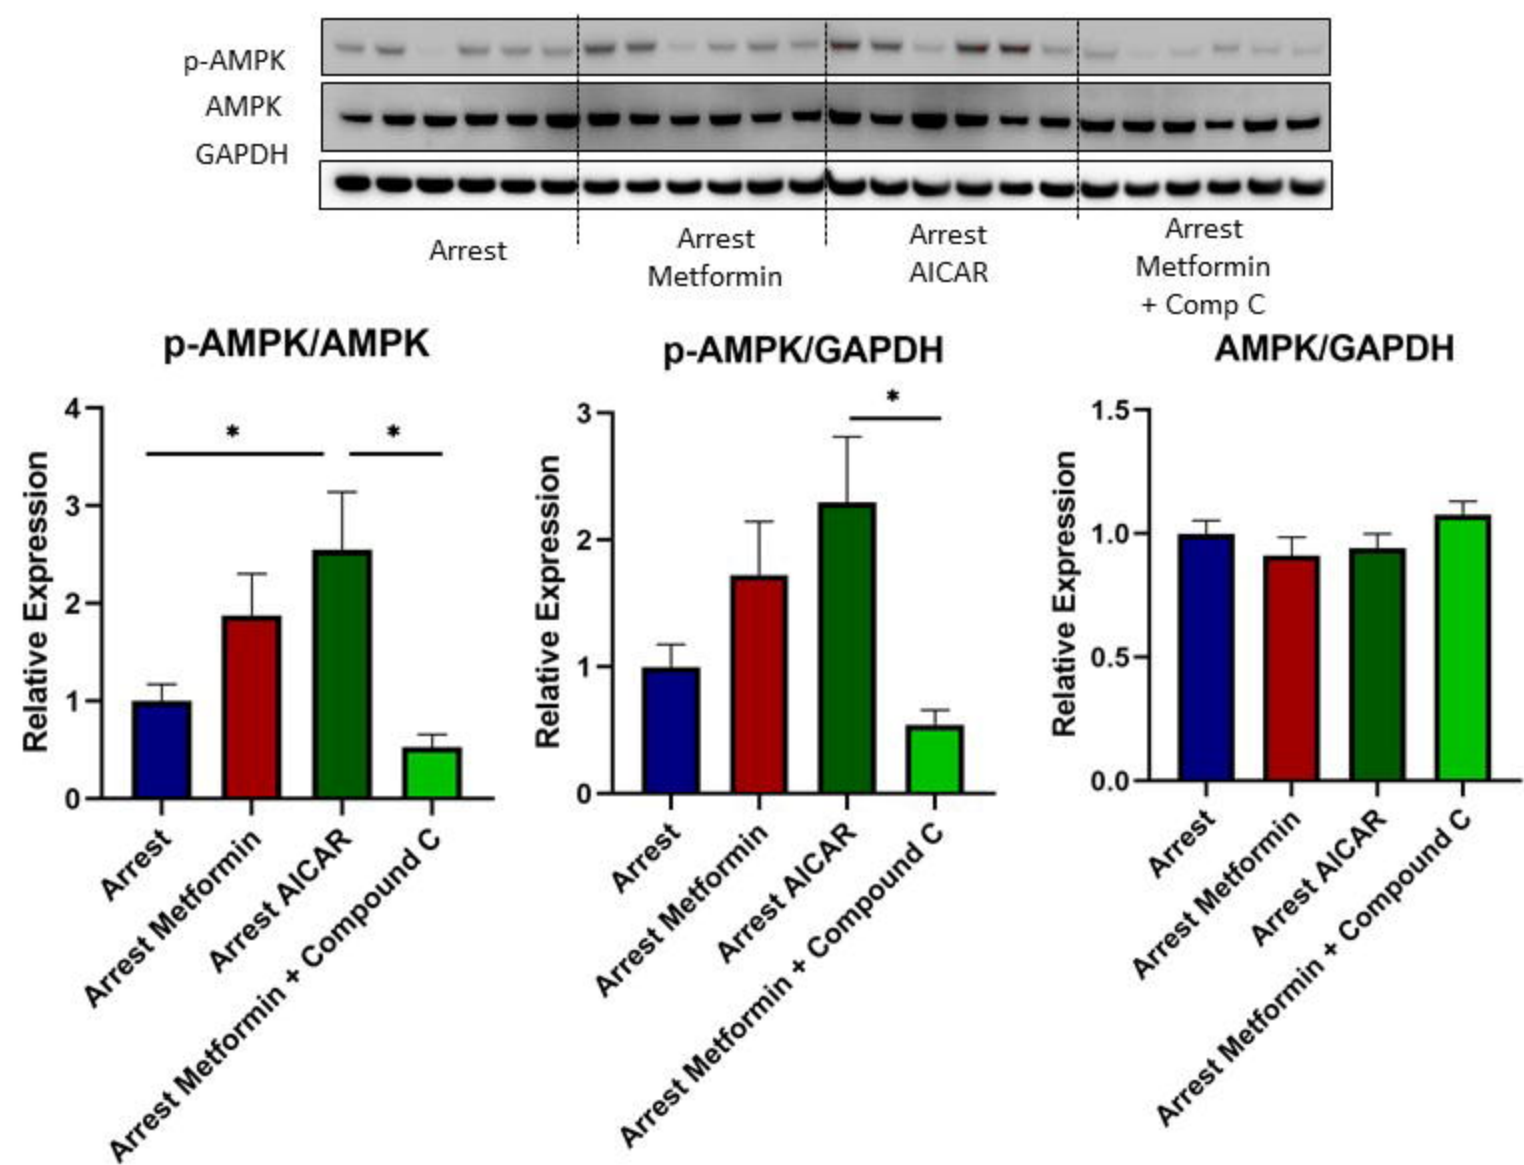

**Figure 3. AMPK activation alone improves cardiac outcomes after SCA, and AMPK activation is necessary to exert metformin's cardioprotection.** A) SCA mice pretreated with the AMPK-activator AICAR (Arrest AICAR; n=9) have improved EF when compared to untreated arrest mice (n=15; data presented in Figure 2). Mice pretreated with both metformin and the AMPK-inhibitor Compound C (Arrest Met + Comp C; n=9) have decreased EF when compared to untreated arrest mice. B) AICAR treatment causes significant p-AMPK/AMPK elevation when compared to untreated arrest mice (n=6 for all groups). Data are expressed as mean +/- SEM. P-values: \* < 0.05, \*\* < 0.01, \*\*\* < 0.001 by one-way ANOVA with Dunnett's post-hoc analysis (A) or Tukey post-hoc analysis (B). AICAR, 5-aminoimidazole-4-carboxamide-1- $\beta$ -D-ribofuranoside; Comp C, Compound C; EF, ejection fraction.

bioRxiv preprint doi: <https://doi.org/10.1101/2021.08.24.457986>; this version posted August 25, 2021. The copyright holder for this preprint (which was not certified by peer review) is the author/funder. All rights reserved. No reuse allowed without permission.



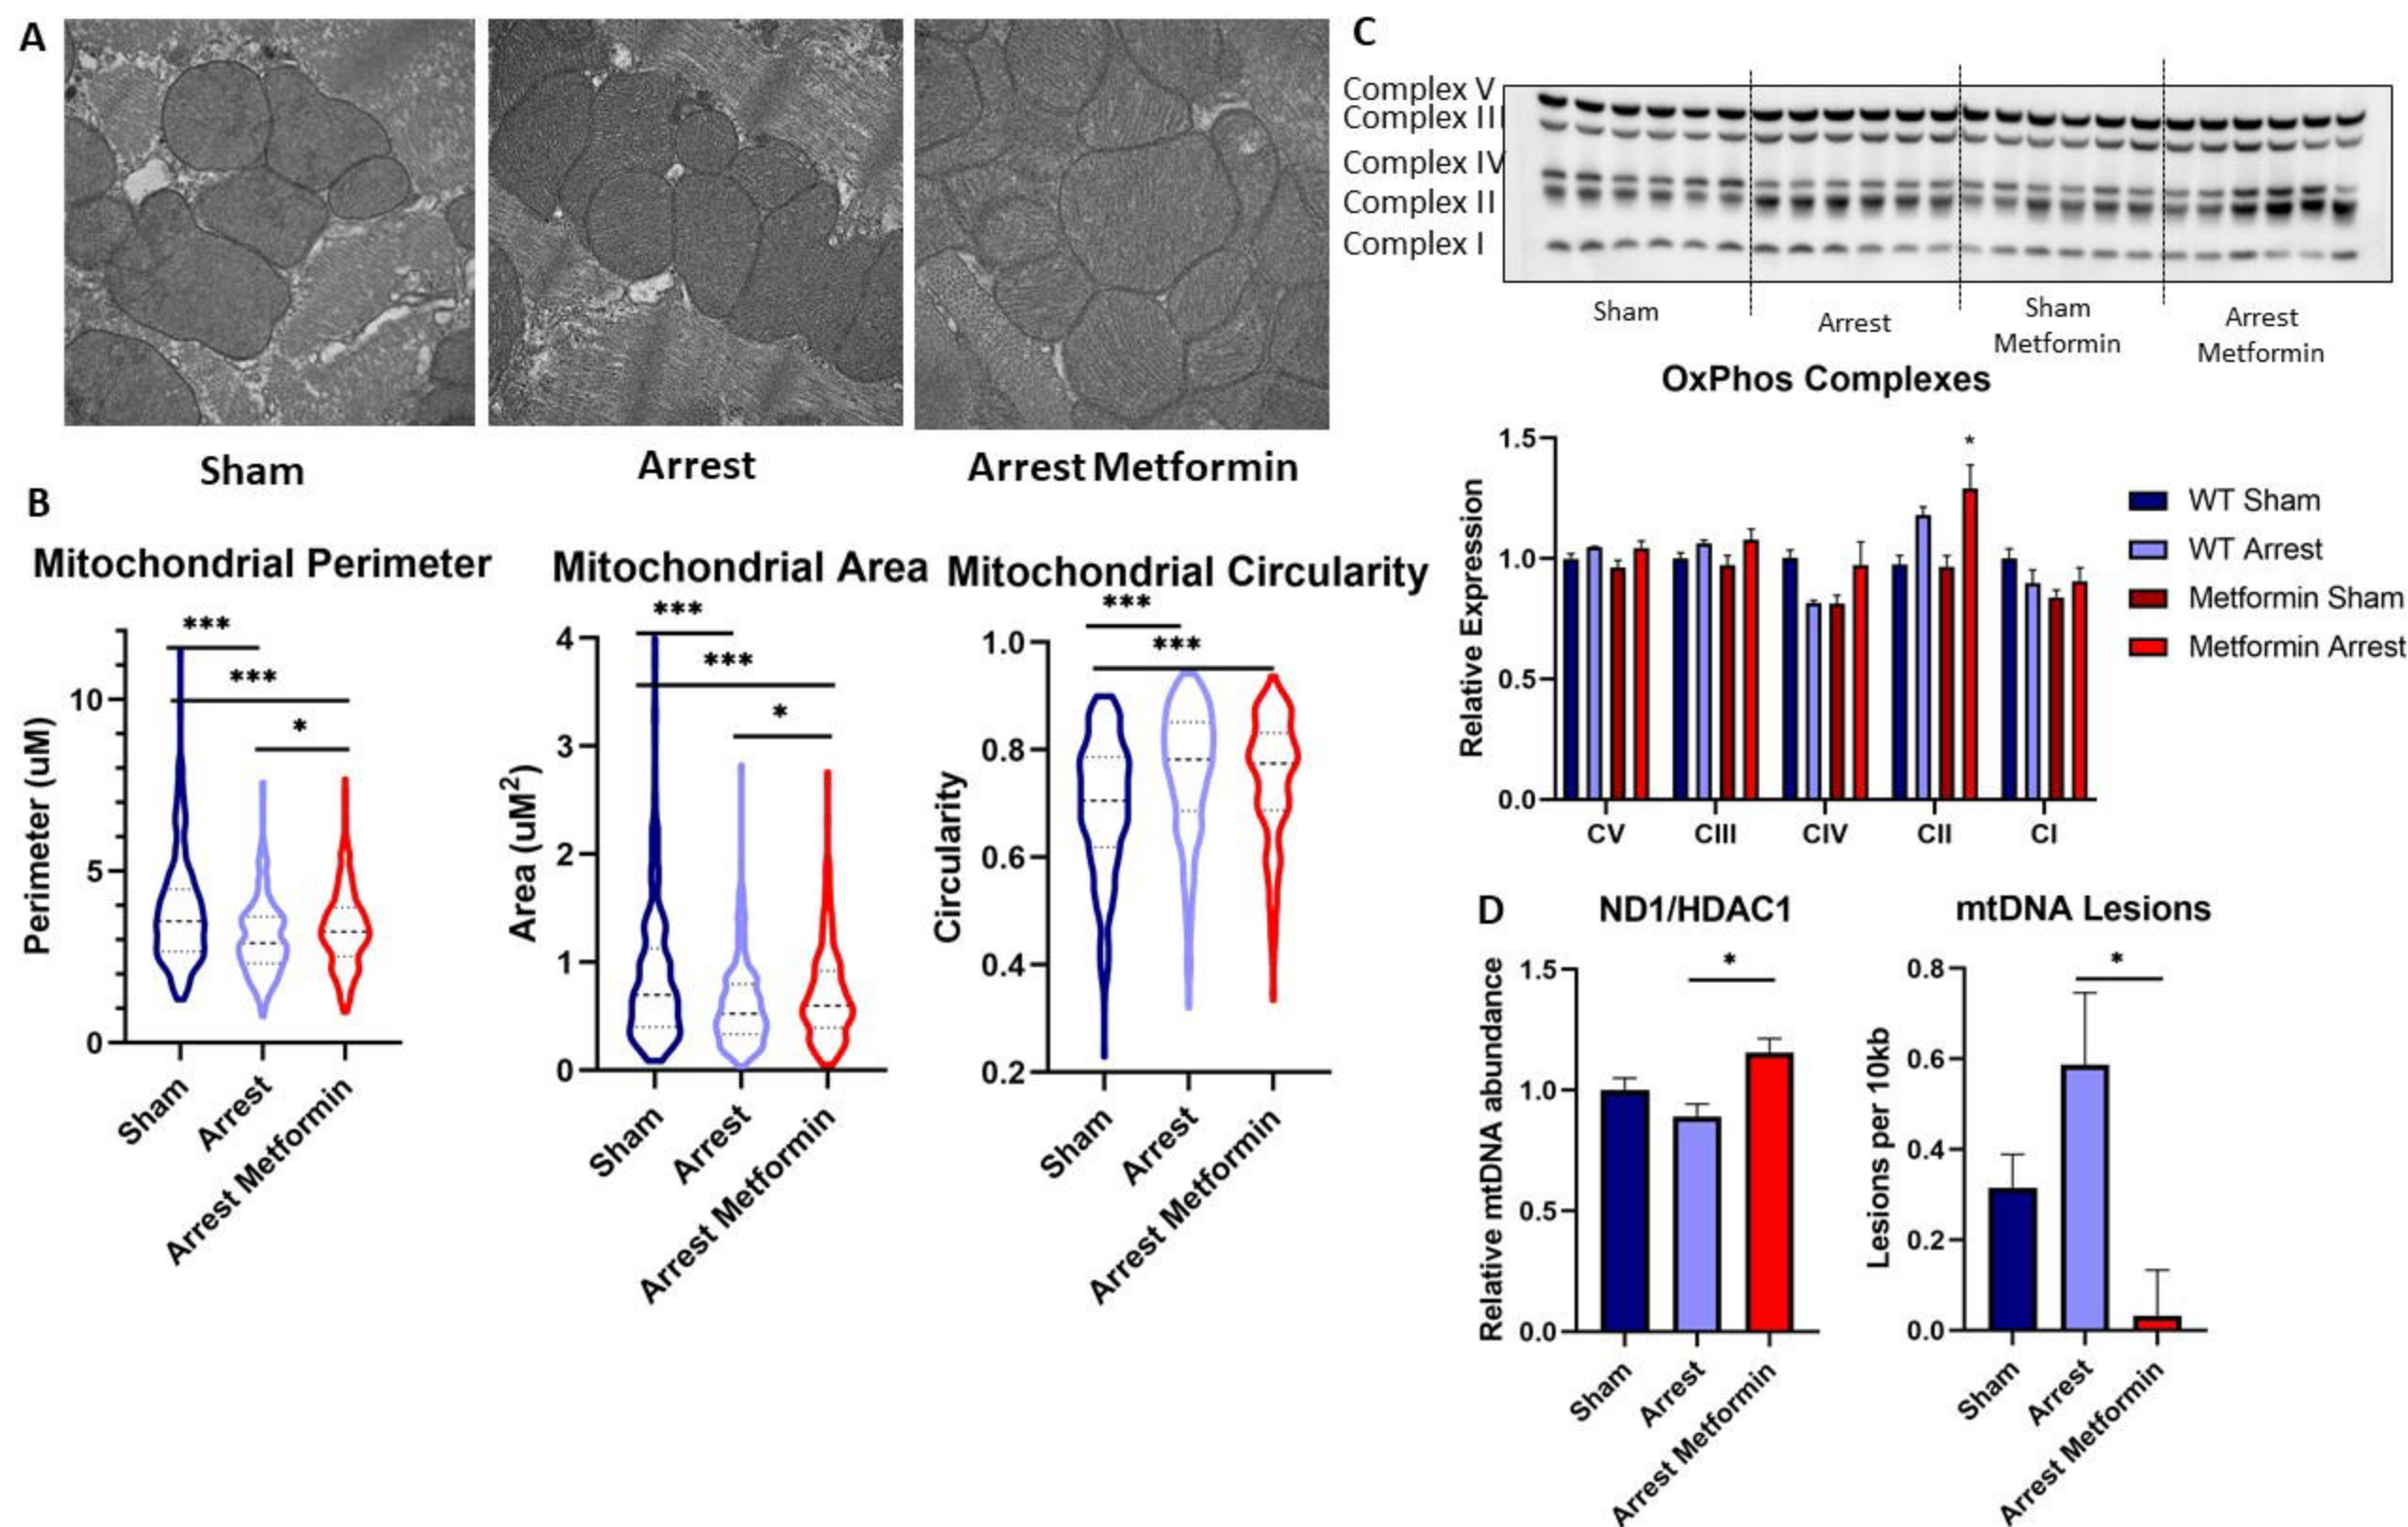

**Figure 4. Metformin affects mitochondrial characteristics after SCA.** A) Representative electron microscope images of intrafibrillar mitochondria in untreated sham, untreated arrest, and metformin pretreated arrest mice one day after surgery (40,000x magnification). B) Mitochondria are smaller and more circular in untreated arrest and metformin treated arrest mice when compared to sham, and metformin treated arrest mice have larger mitochondria than untreated arrest mice (n=50 per group). C) Electron transport chain expression is largely unchanged between treatment groups, with the exception of complex II (CII) expression in metformin-pretreated arrest mice being significantly higher than untreated sham mice one day after arrest (n=6/group, normalized to ponceau stain). D) mtDNA copy number is increased and has less damage in metformin treated arrest mice (n=7) when compared to untreated arrest mice (n=5). Untreated arrest mice had no changes to mtDNA copy number or damage when compared to sham. Data are expressed as mean  $\pm$  SEM. P-values: \* < 0.05, \*\* < 0.01, \*\*\* < 0.001 by one-way ANOVA with Tukey post-hoc analysis. ND1, NADH dehydrogenase 1; HDAC1, Histone deacetylase 1; mtDNA, mitochondrial DNA; WT, wild-type.

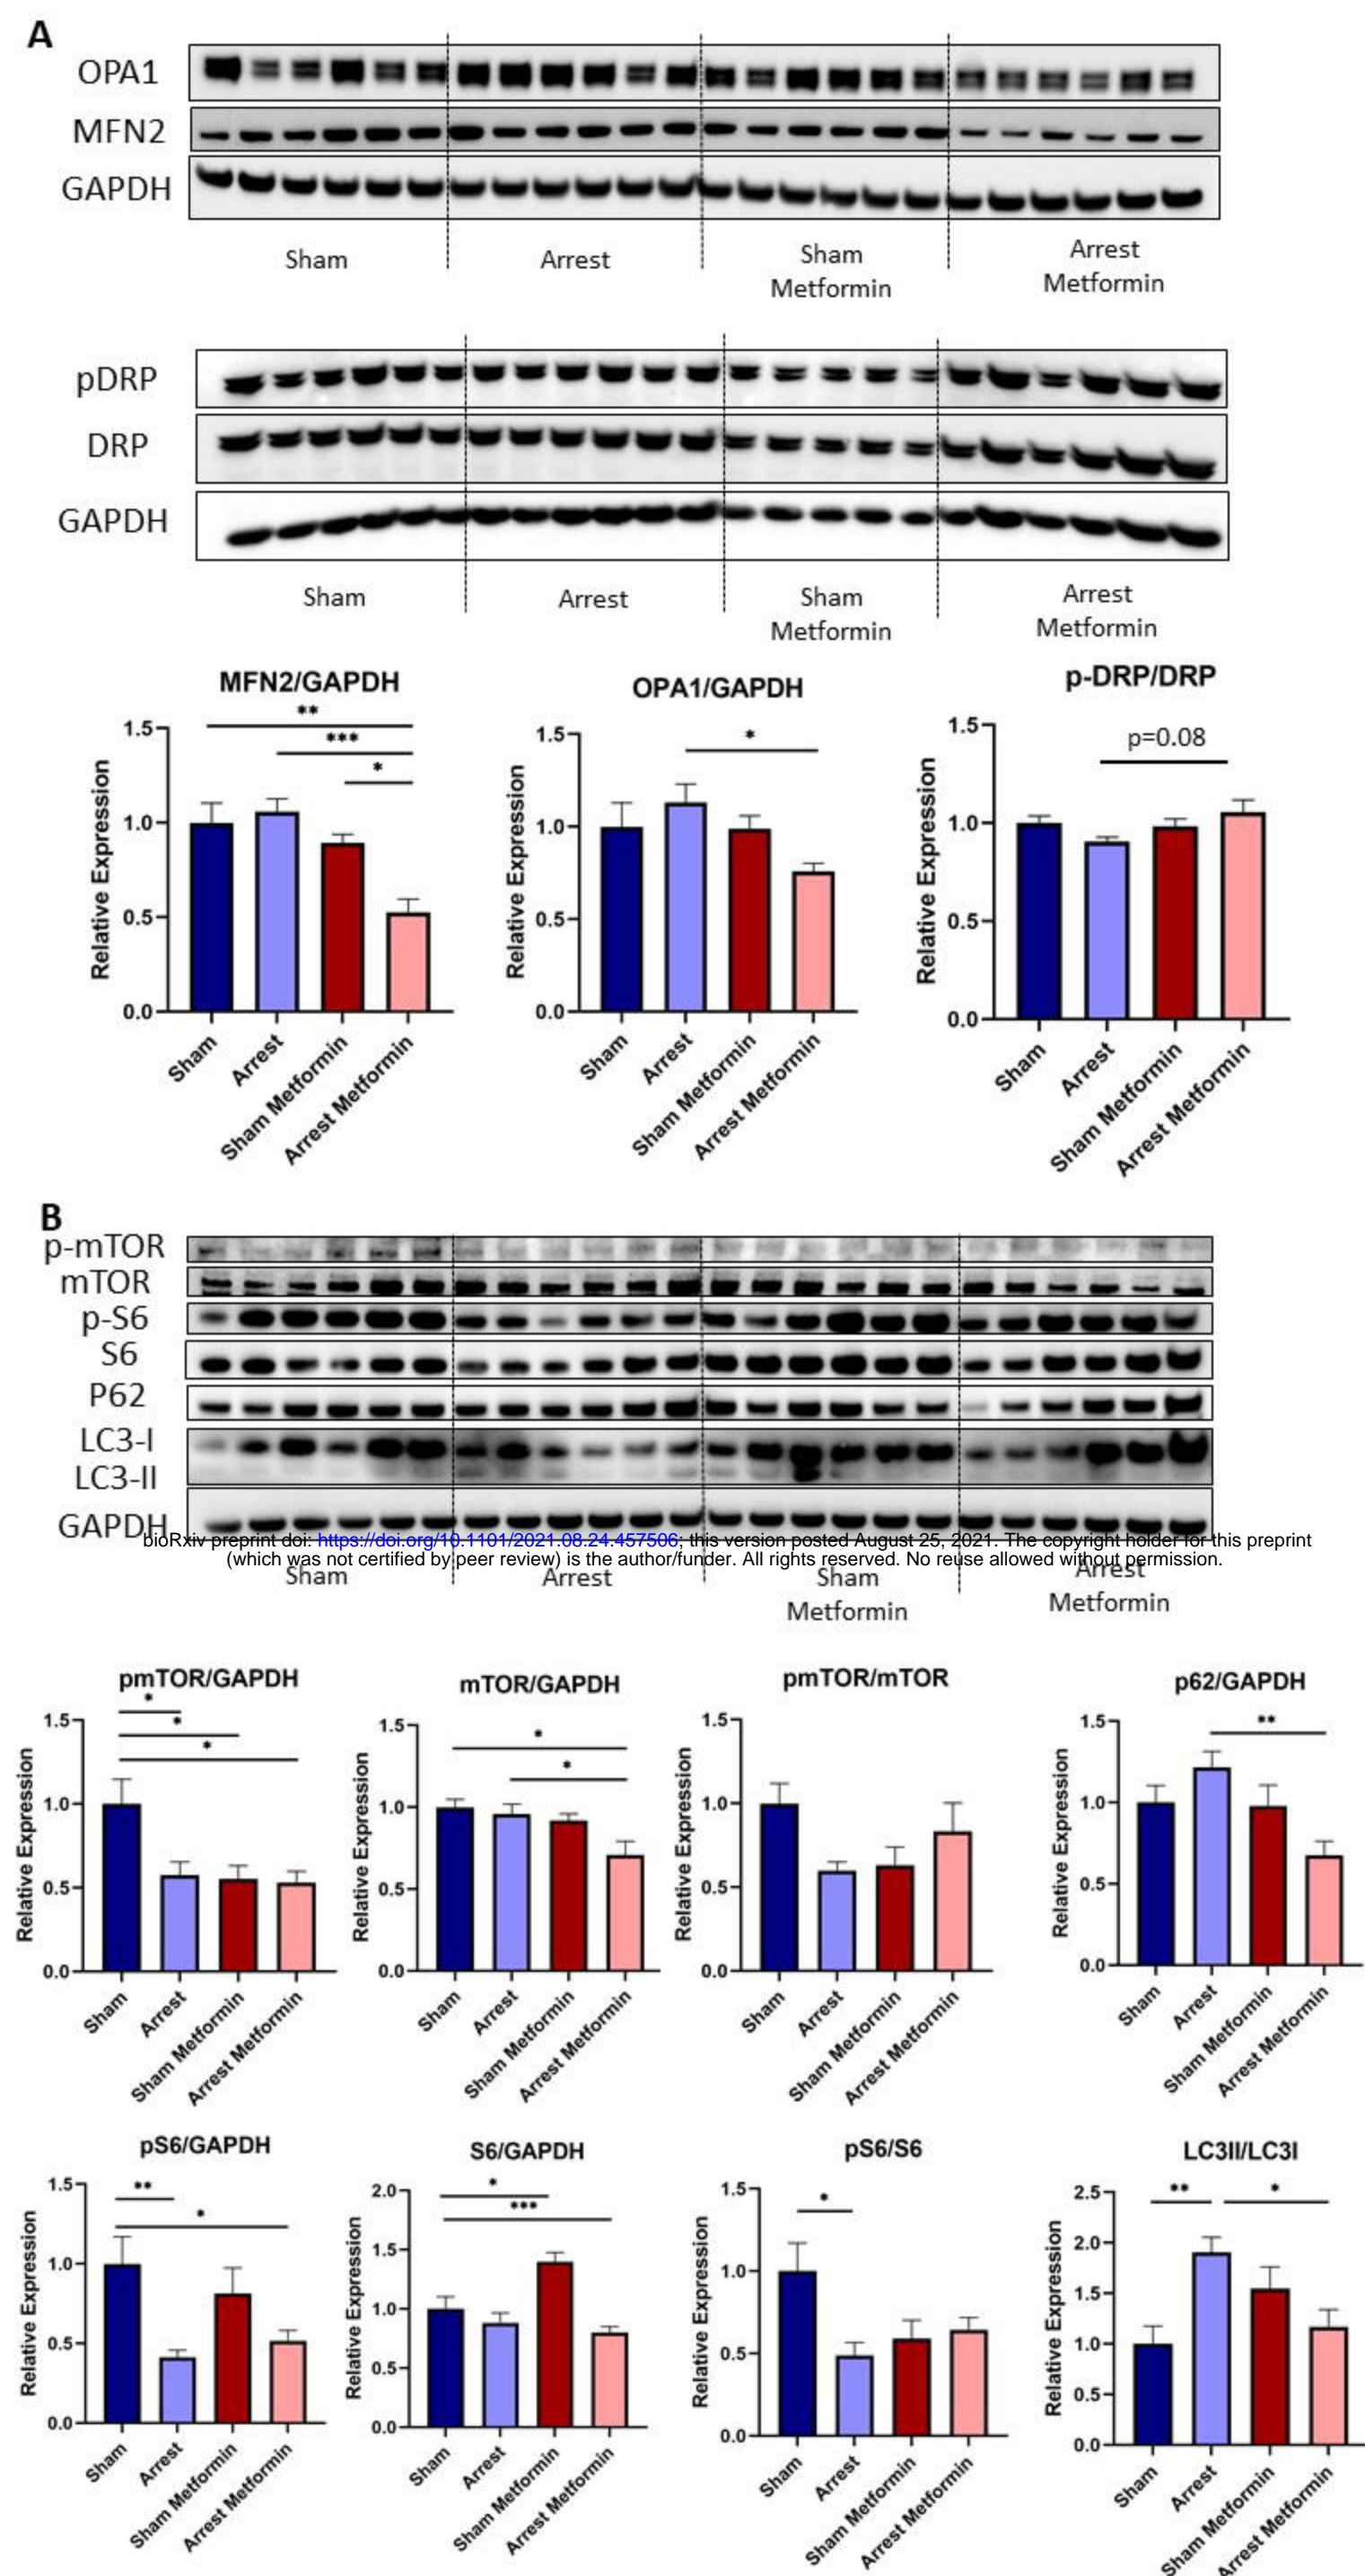

**Figure 5. Metformin pretreatment affects autophagy and mitochondrial dynamics after sudden cardiac arrest (SCA). A)** Representative western blot images of markers of mitochondrial fission and fusion. Mitofusin 2 (MFN2) is significantly depressed in metformin treated arrest mice (n=6) compared to untreated sham (n=6), untreated arrest (n=6), and sham metformin (n=5) groups. OPA1 is significantly depressed in metformin treated arrest compared to untreated arrest mice. There is no significant change to p-DRP expression between groups. B) Representative western blot images of autophagy related proteins downstream of AMPK. p-mTOR expression is reduced in untreated arrest, metformin treated sham, and metformin treated arrest mice when compared to untreated sham, and metformin treated mice have lower total mTOR than untreated sham and arrest groups. p-S6, a marker of mTOR activity, is also reduced in untreated arrest and metformin treated arrest mice when compared to sham. S6 expression is increased in sham metformin mice, but depressed in metformin arrest mice compared to sham, while the p-S6/S6 ratio is only significantly changed in the untreated arrest mice when compared to sham. P62, a marker of autophagosome formation, is lower in metformin treated arrest mice compared to untreated arrest mice. Untreated arrest mice have significantly elevated LC3II/LC3I, a marker of autophagy, compared to sham mice and metformin treated arrest mice (n=6/group). Data are expressed as mean  $\pm$  SEM. P-values: \* < 0.05, \*\* < 0.01, \*\*\* < 0.001 by one-way ANOVA with Tukey post-hoc analysis for all groups, except for the p-S6 analyses, which used Dunnett's post-hoc analysis. DRP, dynamin-related protein1; LC3, microtubule-associated protein light chain; MFN2, mitofusin 2; mTOR, mechanistic target of rapamycin; OPA1, dynamin-like 120 kDa protein, mitochondrial.

A

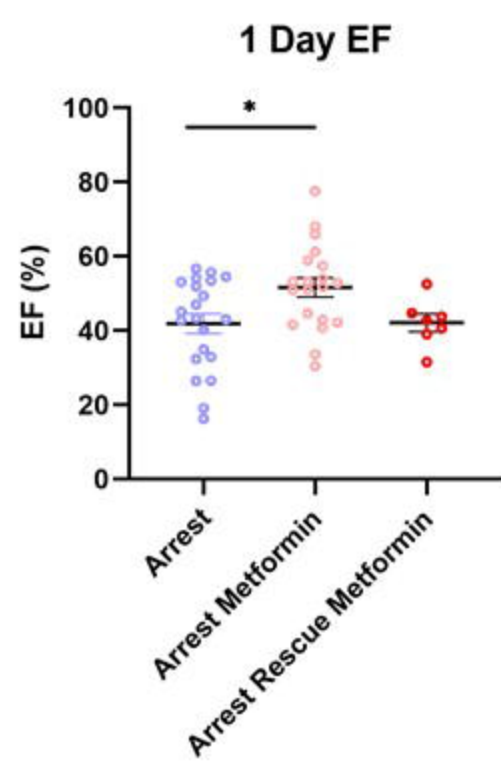

**Figure 6. Metformin does not work as a rescue therapy following arrest.** A) When given concomitantly with epinephrine, intravenous metformin (n=6) did not demonstrate any change to ejection fraction (EF) when compared to untreated arrest mice (n=15; data presented in Figure 2) or metformin treated arrest mice (n=20, data presented in Figure 2). P-values: \* < 0.05 by one-way ANOVA with Tukey post-hoc analysis.

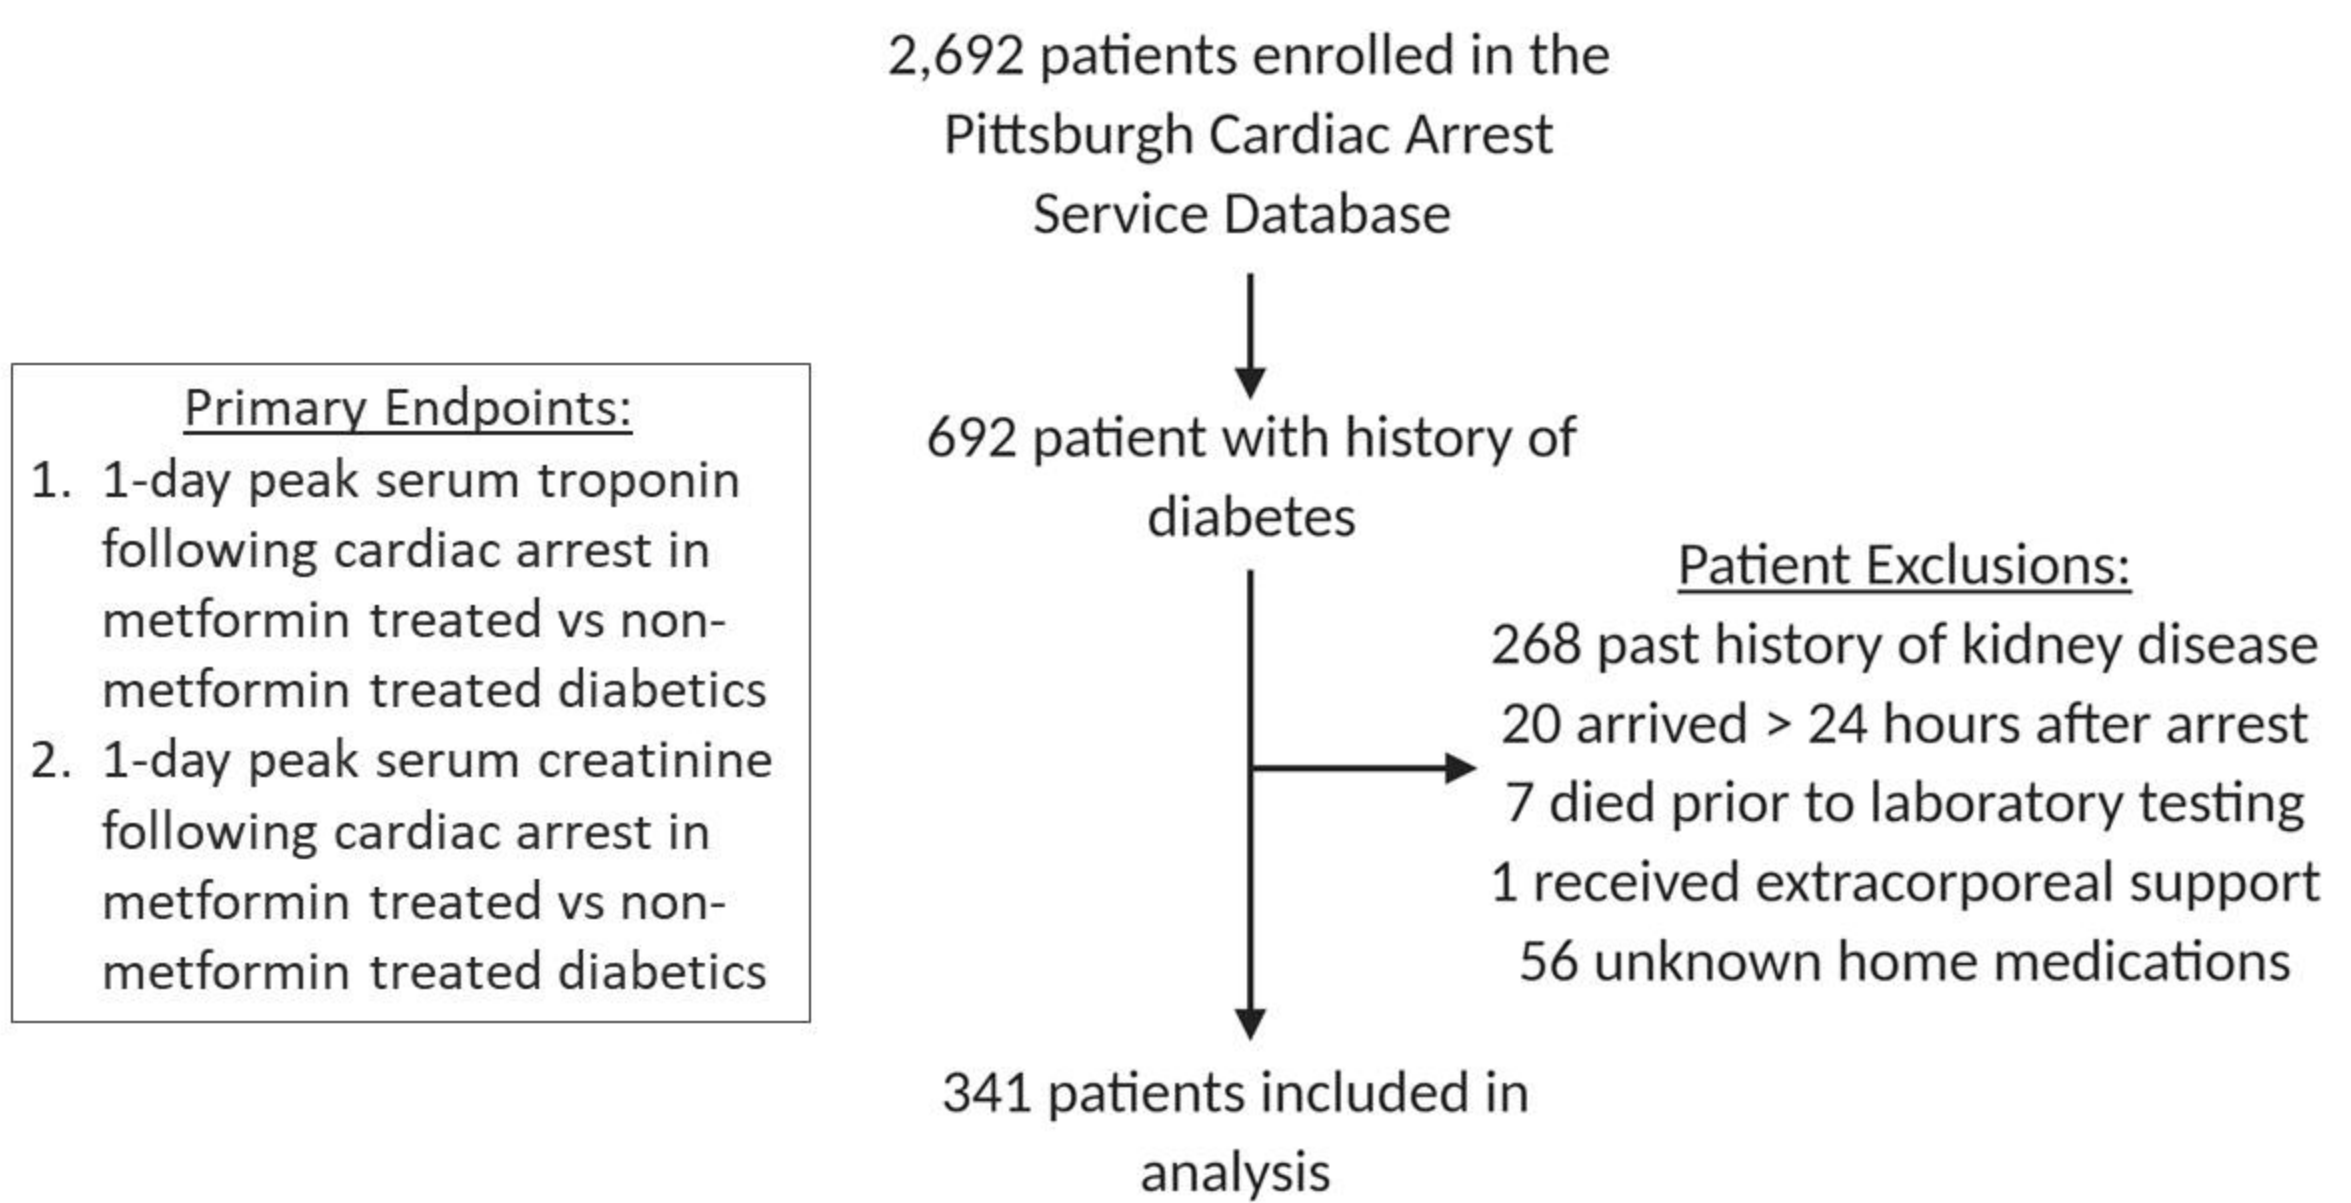

**Figure 7. Summary of clinical inclusion and exclusion data for retrospective analysis of the Pittsburgh Post-Cardiac Arrest Service patient database.** Primary outcomes evaluated included peak serum troponin and peak serum creatinine in diabetic patients with (n=122) and without (n=174) a history of metformin therapy.

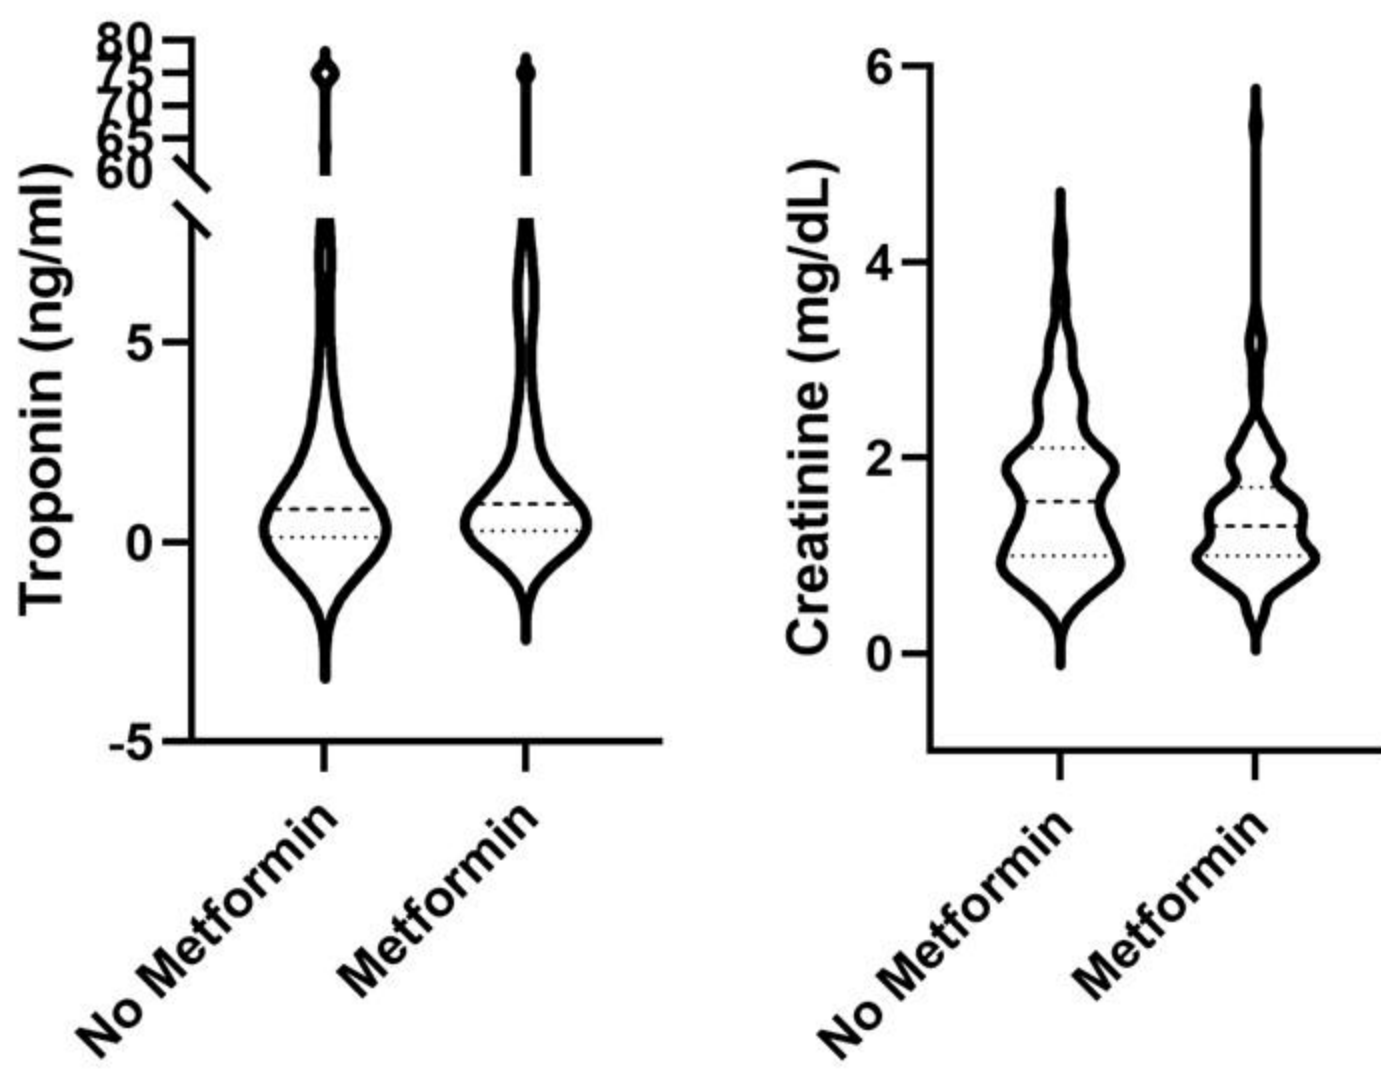

**Figure 8. Distributions of peak 24-hour serum troponin and peak 24-hour serum creatinine for diabetic patients with and without metformin therapy prior to arrest. Dashed lines represent median values and dotted lines represent upper and lower quartiles.**

**Table 1. Surgical data for arrest mice.** There are no significant changes to body weight or body temperature at time of extubation between treatment groups. There is no change in time to return of spontaneous circulation (ROSC) or time to extubation between untreated arrest and treated arrest groups. There is no change to random blood glucose 24-hours after arrest between sham, untreated arrest, and metformin pretreated arrest mice. Data are presented as mean  $\pm$  SEM unless otherwise noted. Analysis by one-way ANOVA with Tukey post-hoc analysis.

|                                           | Sham (n=20)      | Arrest (n=26)    | Sham Metformin (n=8) | Arrest Metformin (n=21) | Arrest Low Dose Metformin (n=9) | Arrest AICAR (n=9) | Arrest Metformin+ Compound C (n=8) | Arrest Rescue Metformin (n=7) |
|-------------------------------------------|------------------|------------------|----------------------|-------------------------|---------------------------------|--------------------|------------------------------------|-------------------------------|
| Age (d)                                   | 57.55 $\pm$ 0.68 | 57.60 $\pm$ 0.59 | 58.75 $\pm$ 0.40     | 58.80 $\pm$ 0.48        | 60.33 $\pm$ 0.53                | 58.44 $\pm$ 0.50   | 58.75 $\pm$ 0.37                   | 60.71 $\pm$ 0.61              |
| # Female / Total Mice (percentage)        | 11/20 (55%)      | 12/26 (46%)      | 5/8 (63%)            | 12/21 (57%)             | 4/9 (44%)                       | 4/9 (44%)          | 4/8 (50%)                          | 3/7 (43%)                     |
| Body Wt (g)                               | 23.19 $\pm$ 0.83 | 22.97 $\pm$ 0.62 | 21.05 $\pm$ 0.88     | 21.77 $\pm$ 0.78        | 20.86 $\pm$ 0.84                | 22.59 $\pm$ 1.1    | 22.47 $\pm$ 1.23                   | 22.46 $\pm$ 1.34              |
| Temp at Extubation ( $^{\circ}$ C)        | 35.86 $\pm$ 0.15 | 35.53 $\pm$ 0.20 | 35.96 $\pm$ 0.18     | 35.95 $\pm$ 0.12        | 35.53 $\pm$ 0.21                | 35.79 $\pm$ 0.19   | 36.21 $\pm$ 0.11                   | 35.86 $\pm$ 0.23              |
| ROSC (min)                                | -                | 1.31 $\pm$ 0.09  | -                    | 1.43 $\pm$ 0.15         | 1.11 $\pm$ 0.11                 | 1.44 $\pm$ 0.24    | 1.13 $\pm$ 0.12                    | 1.29 $\pm$ 0.18               |
| Time to Extubation (min)                  | -                | 22.31 $\pm$ 0.66 | -                    | 23.64 $\pm$ 0.32        | 22.72 $\pm$ 0.49                | 22.06 $\pm$ 0.90   | 24.06 $\pm$ 0.52                   | 22.71 $\pm$ 0.84              |
| Time to Kidney Reperfusion (min)          | -                | 21.3 $\pm$ 0.90  | -                    | 21.79 $\pm$ 0.57        | 22.24 $\pm$ 0.49                | 20.43 $\pm$ 1.01   | 24.70 $\pm$ 0.64                   | 22.50 $\pm$ 0.97              |
| Random glucose 24 h after arrest (mmol/L) | 184.3 $\pm$ 25.0 | 205.8 $\pm$ 10.0 | -                    | 218.8 $\pm$ 28.0        | -                               | -                  | -                                  | -                             |

bioRxiv preprint doi: <https://doi.org/10.1101/2021.08.24.457506>; this version posted August 25, 2021. The copyright holder for this preprint (which was not certified by peer review) is the author/funder. All rights reserved. No reuse allowed without permission.

**Table 2. Baseline demographics and clinical characteristics.** Data are presented as mean  $\pm$  standard deviation, median [interquartile range], or sample number (corresponding percentage).

| Characteristic                 | Overall cohort<br>(n = 341) | Metformin<br>(n = 140) | No metformin<br>(n = 201) |
|--------------------------------|-----------------------------|------------------------|---------------------------|
| Age, years                     | 65 $\pm$ 13                 | 65 $\pm$ 12            | 64 $\pm$ 14               |
| Female sex                     | 148 (43)                    | 58 (41)                | 90 (45)                   |
| Arrest out-of-hospital         | 256 (75)                    | 108 (77)               | 148 (74)                  |
| Shockable rhythm               | 109 (32)                    | 39 (28)                | 70 (35)                   |
| Witnessed collapse             | 160 (47)                    | 70 (50)                | 90 (45)                   |
| Layperson CPR                  | 156 (46)                    | 72 (51)                | 84 (42)                   |
| Epinephrine doses              | 2 [1 – 4]                   | 3 [1 – 4]              | 2 [1 – 4]                 |
| Arrest duration, min           | 16 [8 – 27]                 | 16 [8 – 32]            | 16 [8 – 23]               |
| Cardiac etiology               | 96 (28)                     | 36 (26)                | 60 (30)                   |
| Charlson Comorbidity index     | 2 [2 – 3]                   | 2 [1 – 3]              | 3 [2 – 3]                 |
| Insulin                        | 152 (45)                    | 34 (24)                | 118 (59)                  |
| Other oral diabetic medication | 92 (27)                     | 47 (34)                | 45 (22)                   |
| Peak 24h troponin              | 0.88 [0.19 – 5.7]           | 0.97 [0.29 – 4.71]     | 0.84 [0.14 – 7.0]         |
| Peak 24h creatinine            | 1.4 [1.0 – 2.0]             | 1.3 [1.0 – 1.7]        | 1.6 [1.0 – 2.1]           |

**Table 3. Association between metformin use and peak serum creatine and troponin by log link model.** Model was adjusted for age, sex, arrest location (in- vs out-of-hospital), witnessed collapse, layperson cardiopulmonary resuscitation, presenting rhythm, arrest duration, number of epinephrine administered, cardiac etiology of arrest, Charlson Comorbidity index, insulin, and other oral diabetic medications. Both peak serum creatinine level and peak serum troponin level 24 hours post-arrest are significantly associated with history of metformin use.

| Endpoint   | Coefficient (95% CI)  | P value |
|------------|-----------------------|---------|
| Creatinine | -0.19 (-0.30 – -0.08) | 0.001   |
| Troponin   | -1.29 (-2.11 – -0.46) | 0.002   |
